1 ***Bark beetles locate fungal symbionts by detecting volatile fungal***  
2 ***metabolites of host tree resin monoterpenes***

3 Dineshkumar Kandasamy<sup>1\*</sup>, Rashaduz Zaman<sup>1</sup>, Yoko Nakamura<sup>2,3</sup>, Tao Zhao<sup>4</sup>, Henrik  
4 Hartmann<sup>5</sup>, Martin N Andersson<sup>6</sup>, Almuth Hammerbacher<sup>7</sup> and Jonathan Gershenzon<sup>1\*</sup>

5 <sup>1</sup> Department of Biochemistry, Max Planck Institute for Chemical Ecology, Jena,  
6 Germany

7 <sup>2</sup> Department of Natural Product Biosynthesis, Max Planck Institute for Chemical  
8 Ecology, Jena, Germany

9 <sup>3</sup>Research Group Biosynthesis/NMR, Max Planck Institute for Chemical Ecology, Jena,  
10 Germany

11 <sup>4</sup>School of Science and Technology, Örebro University, 701 82, Örebro, Sweden

12 <sup>5</sup> Department of Biogeochemical Processes, Max Planck Institute for Biogeochemistry,  
13 Jena, Germany

14 <sup>6</sup> Department of Biology, Lund University, Lund, Sweden

15 <sup>7</sup> Department of Zoology and Entomology, Forestry and Agricultural Biotechnology  
16 Institute, University of Pretoria, Pretoria, South Africa

17 \*Corresponding authors

18 E-mail: [dkandasamy@ice.mpg.de](mailto:dkandasamy@ice.mpg.de) and [gershenzon@ice.mpg.de](mailto:gershenzon@ice.mpg.de)

## 19 **Abstract**

20 Outbreaks of bark beetles have decimated millions of hectares of conifer forest  
21 worldwide in recent years. The ability of these tiny 3-6 mm long insects to kill mature  
22 trees over a short period has been ascribed to two factors: (1) mass attacks on the host  
23 tree to overcome tree defenses and (2) the presence of fungal symbionts that support  
24 successful beetle development in the tree. While the role of pheromones in coordinating  
25 mass attacks has been well studied, the role of chemical communication in maintaining  
26 the fungal symbiosis is poorly understood. We previously demonstrated that Eurasian  
27 spruce bark beetles (*Ips typographus*) can recognize beneficial fungal symbionts of the  
28 genera *Grosmannia*, *Endoconidiophora* and *Ophiostoma* by their *de novo* synthesized  
29 volatile compounds. We hypothesized that the fungal symbionts of the bark beetles  
30 might metabolize spruce resin monoterpenes of the beetle's host tree, Norway spruce  
31 (*Picea abies*), and that the volatile products could be used as cues by beetles for  
32 locating breeding sites with beneficial symbionts. *Grosmannia penicillata* and other  
33 fungal symbionts altered the profile of spruce bark volatiles by converting the major  
34 monoterpenes to oxygenated derivatives. Bornyl acetate was metabolized to camphor,  
35 and  $\alpha$ - and  $\beta$ -pinene to *trans*-4-thujanol and other oxygenated products. Extensive  
36 electrophysiological measurements showed that bark beetles possess olfactory sensory  
37 neurons that are selective for these oxygenated symbiont metabolites. Compounds  
38 such as camphor and *trans*-4-thujanol attracted beetles at specific doses in olfactory  
39 experiments and stimulated the response of female beetles to a mixture of pheromones.  
40 Finally, the fungal symbiont was found to stimulate bark beetle tunneling on diets.  
41 Collectively, our results show that oxygenated metabolites of conifer monoterpenes  
42 produced by fungal symbionts are used by bark beetles as cues to find these essential

43 microbial symbionts. The oxygenated metabolites may aid beetles in assessing the  
44 presence of the fungus, the defense status of the host tree and the density of  
45 conspecifics at potential feeding and breeding sites.

46

47

48

49

50

51

52

53

54

55

56

57

58

59

60

61 **Introduction**

62 Herbivorous insects respond readily to airborne chemical cues, and many interactions  
63 between insects and their host plants are known to be mediated by volatile organic  
64 compounds [1–4]. In contrast, volatile signals between herbivorous insects and their  
65 symbiotic microbes have been less studied, aside from a few well-known examples  
66 including ambrosia beetles, termites, and the vinegar fly *Drosophila melanogaster* [5–8].  
67 Yet, such signals could be as critical for insect success as their response to host plant  
68 cues. In some insect-microbe symbioses, microbes transform host plant metabolites  
69 creating volatile signals that are used by insects for food or brood site selection [7–10].  
70 For example, yeasts vectored by *D. melanogaster* metabolize dietary phenolic  
71 antioxidants and release volatile phenolics that attract both larvae and adults to feed on  
72 antioxidant-rich foods [11]. Nevertheless, there is still comparatively little information  
73 about how microbial transformation of host plant chemicals influences insect-microbe  
74 symbioses, and whether the resulting metabolites represent honest signals of partner  
75 benefits.

76 Microbial symbioses are especially characteristic of wood-boring insects such as bark  
77 and ambrosia beetles. Bark beetles have captured much attention recently because of  
78 their large-scale outbreaks in many parts of the world. In Europe, for example, the  
79 Eurasian spruce bark beetle (*Ips typographus*) has killed millions of hectares of spruce  
80 stands as a result of global warming and management practices that increase forest  
81 vulnerability to epidemic outbreaks [12–16]. *Ips typographus* feeds and raises broods in  
82 the phloem tissues of trees, which contain high levels of terpene and phenolic defense  
83 chemicals [12,17]. This insect overcomes its unfavorable environment by mass attacks  
84 and by introducing a suite of microbes into the host, including the ectosymbiotic

85 ophiostomatoid fungi- *Grosmannia penicillata*, *G. europioides*, *Endoconidiophora*  
86 *polonica* and *Ophiostoma bicolor* that cause blue staining of infected wood [18–22].  
87 Although the exact benefit of fungal symbionts to *I. typographus* is not yet well  
88 understood, these necrotrophic fungi may exhaust host tree defenses, metabolize host  
89 defense compounds, and provide nutritional benefits to larvae and adults [23–26].

90 Conifer oleoresins are a formidable defense against insects and pathogens, as they can  
91 poison and physically entrap invaders [27–30]. However, the volatile fraction of the  
92 resin, especially the monoterpenes, also plays a central role in the colonization of host  
93 trees by bark beetles [28,31,32]. After locating a suitable tree, pioneer male *I.*  
94 *typographus* oxidize the dominant host monoterpene  $\alpha$ -pinene to *cis*-verbenol, which is  
95 used as an aggregation pheromone in combination with the *de novo* produced 2-methyl-  
96 3-buten-2-ol to attract conspecifics for a mass attack [33–35]. In addition to bark beetle  
97 pheromones, several other oxygenated monoterpenes such as terpinene-4-ol, camphor,  
98 *trans*-4-thujanol and borneol have also been detected at the entrance holes of *I.*  
99 *typographus* galleries [36–39]. Interestingly, the phloem colonized by ophiostomatoid  
100 fungi around these galleries also produces large amounts of oxygenated monoterpenes  
101 compared to galleries without evident fungal growth [37]. However, the ecological  
102 functions of these oxygenated monoterpenes remain poorly understood. In our previous  
103 work, we showed that *I. typographus* bark beetles utilize *de novo* synthesized fungal  
104 volatiles to maintain their association with specific beneficial symbionts and also to  
105 avoid saprophytes [40]. However, it is unknown which volatiles are produced by these  
106 fungi when they colonize their native substrate i.e., the phloem and sapwood of the tree.

107 In this study, we investigated the volatile compounds emitted when fungal symbionts of  
108 *I. typographus* infect the bark of their Norway spruce (*Picea abies*) host trees. We show  
109 that these fungi dramatically alter the volatile monoterpene composition of spruce bark  
110 and demonstrate, using single sensillum recordings, that adult *I. typographus* can 1)  
111 perceive the fungal-produced monoterpenes and 2) are attracted to these compounds in  
112 behavioral bioassays. Our results indicate that bark beetles respond to symbiont  
113 biotransformation products of host tree metabolites and employ them to identify suitable  
114 sites for feeding and breeding.

## 115 **Results**

### 116 **Bark beetles are attracted to volatiles from their symbiotic fungi grown on a** 117 **spruce bark medium**

118 We first tested whether adult bark beetles were attracted to volatiles produced by the  
119 symbiotic fungus *G. penicillata* when grown on two different growth media, potato  
120 dextrose agar (PDA) and spruce bark agar (SBA). In laboratory trap bioassays, adult  
121 beetles were strongly attracted to volatiles emitted by *G. penicillata* grown on both PDA  
122 or SBA compared to their respective fungus-free agar controls (Fig 1) (PDA,  $z = 3.34$ ,  $p$   
123  $= 0.001$ ; SBA,  $z = 2.83$ ,  $p = 0.005$ , Wilcoxon's test). However, bark beetles showed a  
124 much stronger attraction towards *G. penicillata* grown on SBA over the same fungus  
125 grown on PDA (Fig 1D) ( $z = 4.28$ ,  $p < 0.001$ , Wilcoxon's test). This indicates that the  
126 volatile profile of this fungus grown on spruce bark agar is distinct and highly preferred  
127 by adult beetles compared to the volatile profile when grown on agar without spruce  
128 bark. Volatiles from several other bark beetle primary and secondary fungal symbionts,

129 such as *E. polonica* and *G. europhioides*, grown on SBA were also highly attractive to  
130 adult beetles, although not all bark beetle-associated fungi tested in this way emitted  
131 attractive volatile blends (S1 Fig).

### 132 **Symbiotic fungi alter the volatile profile of the bark**

133 To identify the differences between the volatile profiles of fungus-inoculated and fungus  
134 free bark, headspace volatiles were analyzed using gas chromatography-flame  
135 ionization detection (GC-FID) and gas chromatography-mass spectrometry (GC-MS).  
136 Principal component analysis was performed using the total volatile profile from each  
137 treatment 4 d after the inoculations. PCA analysis revealed that the volatile profile of *G.*  
138 *penicillata*-inoculated bark is distinct from the uninoculated control and nearly 68 % of  
139 the variation in the volatile profiles was explained by the first two principal components  
140 (Fig 2A).

141 To identify which compound groups were altered significantly due to fungal  
142 infection, we analyzed volatiles over a time course of 4 d, 8 d, 12 d and 18 d post  
143 inoculation with *G. penicillata* (Fig 2B, S3 Fig, S2, S3, and S5 Tables). In total, 79  
144 compounds comprising host tree and fungal volatiles were detected in all treatments  
145 and classified into different groups, namely aliphatic hydrocarbons (17 compounds),  
146 aromatics (2 compounds), monoterpene hydrocarbons (15 compounds), oxygenated  
147 monoterpenes (26 compounds), sesquiterpenes (17 compounds) and spiroketals (3  
148 compounds). The proportion of total oxygenated monoterpenes gradually increased to  
149 dominate the volatile profile of *G. penicillata*-infected bark reaching a maximum at 18 d  
150 post inoculation ( $F_{(3,14)} = 3.54$ ,  $p = 0.04$ , ANOVA), while the proportion of total

151 oxygenated monoterpenes was unchanged in mock-inoculated controls (Fig 2B).  
152 Camphor was the major contributor to the overall increase of oxygenated  
153 monoterpenes, with the highest relative abundance after 18 d and a significant  
154 difference between time points ( $F_{(1,16)} = 13.06$ ,  $p = 0.002$ , ANOVA, Tukey's test) (S5  
155 Table). The proportion of monoterpene hydrocarbons gradually decreased over the time  
156 course in both treatments (mock,  $F_{(3,7)} = 11.6$ ,  $p = 0.004$ ; *G. penicillata*,  $F_{(3,15)} = 21.2$ ,  $p$   
157  $< 0.001$ , ANOVA). The proportion of total sesquiterpenes also decreased significantly  
158 over time in *G. penicillata* infected bark ( $F_{(3,15)} = 4.4$ ,  $p = 0.02$ , ANOVA), but not in the  
159 mock-inoculated bark. When measuring emission rate ( $\text{ng mg DW}^{-1} \text{h}^{-1}$ ), the emission of  
160 total monoterpene hydrocarbons in the control and the *G. penicillata* treated bark plugs  
161 was not significantly different at 4 d post inoculation (Fig 2C, S2 Table). However, we  
162 found a dramatic increase in the emission rate of total oxygenated monoterpenes at this  
163 time point in spruce bark inoculated with *G. penicillata* compared to the fungus-free  
164 control (Fig 2D) (9-fold increase,  $t = 7.38$ ,  $p = 0.004$ , Welch's t-test). Out of 19 identified  
165 oxygenated monoterpenes in the bark inoculated with *G. penicillata*, a total of 15  
166 compounds significantly increased between control and fungus infected bark including  
167 camphor (Fig 2E) (S2 Table) (51-fold increase,  $t = 7.7$ ,  $p = 0.004$ , Welch's t-test), *endo*-  
168 borneol (18 fold increase,  $t = 6.7$ ,  $p = 0.001$ ), isopinocampone (3-fold increase,  $t = 6.8$ ,  
169  $p < 0.001$ ), verbenone (2-fold increase,  $t = 4.3$ ,  $p = 0.005$ ) and bornyl acetate (3-fold  
170 increase,  $t = 3.7$ ,  $p = 0.01$ ). Measurements conducted on other *I. typographus* fungal  
171 symbionts also showed differences in the volatile composition of fungal-inoculated  
172 versus control bark (S2 Fig) with increases in the proportion of oxygenated  
173 monoterpenes over time (except for *E. polonica*) (S3 Fig, S4, S6 and S7 Tables).



174 **Symbiotic fungi produce oxygenated monoterpenes from spruce monoterpene**  
175 **hydrocarbons and bornyl acetate**

176 To investigate whether a symbiotic fungus can metabolize the major spruce  
177 monoterpenes, PDA was enriched with 0.5 mg g<sup>-1</sup> (-)-β-pinene, (-)-α-pinene or (-)-bornyl  
178 acetate. The amount of monoterpenes remaining in the medium after 4 d was estimated  
179 using GC/FID measurements from hexane extracts of agar plugs containing *G.*  
180 *penicillata* and a fungus-free control. Only the amount of (-)-bornyl acetate decreased  
181 significantly in *G. penicillata*-inoculated agar compared to fungus-free agar (Fig 2F) ( $t =$   
182  $-3.38$ ,  $p = 0.003$ ). The amounts of (-)-β-pinene and (-)-α-pinene did not differ between  
183 *G. penicillata* and fungus-free agar.

184 Next, we quantified the *G. penicillata* metabolites of (-)-α-pinene, (-)-β-pinene  
185 and (-)-bornyl acetate after adding these three major spruce monoterpenes separately  
186 to PDA. (Fig 2G). The metabolic profiles of the fungus grown on either (-)-α-pinene- or (-)  
187 )-β-pinene-enriched agar were similar, expect that verbenone was produced by the  
188 fungus from (-)-α-pinene but not from (-)-β-pinene. The oxygenated monoterpene,  
189 terpinen-4-ol, was the major biotransformation product and (+)-isopinocampone and  
190 (+)-*trans*-4-thujanol were the minor products produced from (-)-α-pinene and (-)-β-  
191 pinene (S5, S6 Figs). The dominant oxygenated monoterpenes, camphor and *endo*-  
192 borneol, were produced by *G. penicillata* from (-)-bornyl acetate (Fig 2G, bottom panel;  
193 S8 Fig), and their production coincided with the decrease of the precursor (Fig 2F).  
194 Similar results were obtained for the other fungal symbionts tested (S4-S8 Figs). These  
195 results collectively show that symbiotic fungi can dramatically alter the volatile profile of  
196 spruce bark by increasing the emission of oxygenated monoterpenes.

197 **Bark beetles detect oxygenated monoterpenes through specialized olfactory**  
198 **sensory neurons (OSN) in their antennae**

199 To test if bark beetle antennal olfactory sensilla contain OSNs that detect the  
200 biotransformation products of monoterpenes, we challenged 231 olfactory sensilla with  
201 a test panel comprising 92 ecologically relevant compounds diluted in paraffin oil ( $1 \mu\text{g}$   
202  $\mu\text{l}^{-1}$ ) using single cell recordings (S1 Table). Only 23 (~10%) of the sensilla housed  
203 neurons that did not respond to any of the compounds from the odor panel although  
204 their OSNs showed spontaneous firing. We obtained odor-evoked responses with  
205 strong excitation ( $>120 \text{ Hz}$ ) from 198 OSNs and weak excitation ( $<50 \text{ Hz}$ ) from 10  
206 OSNs, allowing the grouping of these neurons into different classes based on their  
207 response profile. From initial screening experiments at a  $10 \mu\text{g}$  dose on filter paper (to  
208 determine the maximum receptive range of OSNs), we identified and classified 20  
209 classes of OSNs. Three OSN classes responded primarily to fungal-produced  
210 oxygenated monoterpenes. We also identified neurons belonging to previously  
211 described OSN classes tuned to pheromones, host tree volatiles and non-host odorants  
212 ([41]; S3 Fig) that are not further considered here.

213 OSN classes tuned to fungal-produced oxygenated monoterpenes were  
214 identified in both the  $A_m$  and  $B_m$  regions on the antennae (Fig 3A). One of these OSN  
215 classes responded most strongly to (+)-isopinocampone, and this class was highly  
216 specific to oxygenated monoterpenes, especially ketones (Fig 3C, left panel). Apart  
217 from (+)-isopinocampone, relatively strong responses were also elicited by (+)-  
218 pinocampone, (-)-isopinocampone, ( $\pm$ )-pinocarvone, ( $\pm$ )-camphor, and (-)-  
219 pinocampone. (Fig 3C, left panel). Dose-response tests showed that this OSN class

220 was the most sensitive to (+)-isopinocampone of all the compounds tested with  
221 responses evident at a dose of 100 pg. The responses to (+)-pinocampone, (-)-  
222 isopinocampone, (±)-pinocarvone and (±)-camphor all appeared between 1 ng and 10  
223 ng doses (Fig 3D, left panel). Another OSN class with specific responses to fungal-  
224 derived compounds responded most strongly to (+)-*trans*-4-thujanol and weakly to (±)-3-  
225 octanol, (±)-1-octen-3-ol, (+)- and (-)-terpinen-4-ol, and (+)- and (-)- $\alpha$ -terpineol (Fig 3C,  
226 middle panel). This OSN showed a 1000-fold lower response threshold to (+)-*trans*-4-  
227 thujanol compared to the next best ligands, the C<sub>8</sub> alcohols (Fig 3D, middle panel).  
228 Finally, an OSN class responding strongly to verbenone,  $\alpha$ -isophorone and  $\beta$ -  
229 isophorone, followed by weaker responses to (-)- and (+)-*trans*-verbenol, pinocarvone,  
230 and (-)-*cis*-verbenol (Fig 3C, right panel) was also found. Dose- response tests revealed  
231 that this neuron class responded the strongest to  $\alpha$ -isophorone across most tested  
232 doses, followed by slightly weaker and similarly strong responses to both verbenone  
233 and  $\beta$ -isophorone (Fig 3D, right panel).

234 A few previously characterized OSN classes for host tree monoterpenes,  
235 including the classes with primary responses to  $\alpha$ -pinene, *p*-cymene, and  $\Delta^3$ -carene,  
236 respectively [41], showed varying secondary responses to some of the fungal-derived  
237 compounds tested here for the first time. For example, the  $\alpha$ -pinene OSN class  
238 responded also to (+)-isopinocampone, (-)-isopinocampone and (±)-pinocarvone and  
239 weakly to (±)-camphor, (-)-myrtenol, *trans*-pinocarveol, carvone, borneol and (-)-  
240 fenchone (S9A Fig). The *p*-cymene OSN class showed intermediate responses to (+)-  
241 *trans*-4-thujanol and carvone (S9B Fig). Although the  $\Delta^3$ -carene OSN class showed  
242 high specificity towards  $\Delta^3$ -carene, ligands such as camphor and (-)-isopinocampone

243 also elicited weak responses from this neuron class (S9C Fig). Collectively, single  
244 sensillum recordings indicated that bark beetles possess OSNs specific for detecting  
245 the oxygenated monoterpenes produced by their associated fungi, and these neurons  
246 do not respond to the respective hydrocarbon precursors. On the other hand, some  
247 oxygenated monoterpenes elicited variable responses in OSN classes responding  
248 primarily to monoterpene hydrocarbons

### 249 **Oxygenated monoterpenes produced by fungal symbionts attract bark beetles**

250 Our previous trap bioassays showed that volatiles from *G. penicillata* grown on spruce  
251 bark agar were strongly attractive to adult beetles (Fig 1C). Therefore, we asked how  
252 the addition of pure monoterpenes to the spruce bark agar could influence the behavior  
253 of beetles towards *G. penicillata*. Our bioassay revealed that addition of 0.1 mg g<sup>-1</sup> and  
254 0.5 mg g<sup>-1</sup> (-)- $\beta$ -pinene to the fungal growth medium did not affect the attraction of  
255 beetles towards *G. penicillata* when tested against a fungus-free control (Fig 4A, left)  
256 (0.1 mg g<sup>-1</sup>,  $z = 2.22$ ,  $p = 0.02$ ; 0.5 mg g<sup>-1</sup>,  $z = 2.54$ ,  $p = 0.01$ , Wilcoxon's test). However,  
257 addition of 1 mg g<sup>-1</sup> (-)- $\beta$ -pinene completely abolished the attraction to *G. penicillata* and  
258 adult beetles were unresponsive in the binary choice test (Fig 4A, left). To further  
259 understand the different responses of beetles towards *G. penicillata* grown on varying  
260 concentrations of (-)- $\beta$ -pinene, individual electrophysiologically-active (-)- $\beta$ -pinene  
261 biotransformation products were used in trap bioassays against a mineral oil control. At  
262 the highest dose tested (1 mg), both *trans*-4-thujanol and terpinen-4-ol were avoided by  
263 adult beetles (Fig 4B *trans*-4-thujanol, left panel; terpinene-4-ol, right panel) (1 mg *trans*-  
264 4-thujanol,  $z = -1.9$ ,  $p = 0.05$ ; 1 mg terpinen-4-ol,  $z = -1.7$ ,  $p = 0.08$ , Wilcoxon's test). On  
265 the other hand, 100  $\mu$ g *trans*-4-thujanol significantly attracted adult beetles (Fig 4B, left

266 panel) ( $z = 2.78$ ,  $p = 0.005$ , Wilcoxon's test). Adult beetles did not discriminate between  
267 *G. penicillata* grown on (-)- $\beta$ -pinene enriched medium and *G. penicillata* grown on non-  
268 enriched medium (Fig 4E). Based on these results, we concluded that beetles show  
269 concentration-specific responses to some (-)- $\beta$ -pinene biotransformation products, but  
270 not to (-)- $\beta$ -pinene itself.

271 Addition of another major host tree monoterpene, (-)-bornyl acetate, to fungal  
272 growth medium at  $0.05 \text{ mg g}^{-1}$  and  $0.5 \text{ mg g}^{-1}$  resulted in strong attraction of *I.*  
273 *typographus* adults towards *G. penicillata* when tested against a fungus-free control  
274 after 4 d incubation (Fig 4C, left panel) ( $0.05 \text{ mg g}^{-1}$ ,  $z = 3.31$ ,  $p = 0.001$ ;  $0.5 \text{ mg g}^{-1}$ ,  $z =$   
275  $3.21$ ,  $p = 0.001$ , Wilcoxon's test). The major biotransformation product of (-)-bornyl  
276 acetate that formed in this period (Fig 4C), camphor, was significantly more attractive to  
277 adult beetles at a  $100 \mu\text{g}$  dose than the mineral oil control (Fig 4D) ( $z = 2.58$ ,  $p = 0.01$ ,  
278 Wilcoxon's test). However, adult beetles preferred *G. penicillata* grown on unenriched  
279 medium against *G. penicillata* grown on high amount of (-)-bornyl acetate ( $0.5 \text{ mg g}^{-1}$ )  
280 enriched medium (Fig 4F) ( $z = 2.12$ ,  $p = 0.03$ , Wilcoxon's test) consistent with their  
281 preference for lower amounts of camphor. By contrast, in the absence of fungus beetles  
282 did not discriminate between diet enriched with monoterpenes and diet without  
283 monoterpenes (S10 Fig). Collectively, these results show that fungal biotransformation  
284 products of host tree monoterpenes can be perceived as attractive cues by adult  
285 beetles, but this attraction varies with the concentration.

286 **Volatiles of symbiotic fungi increase bark beetle attraction to pheromones**

287 Previous studies have detected the emission of several oxygenated monoterpenes from  
288 bark beetle entrance holes on attacked trees during the colonization phase coincident  
289 with the emission of male-produced pheromones [36–38]. Therefore, we tested the role  
290 of fungal symbiont volatiles in the behavioral response of adult beetles towards their  
291 pheromones. *Ips typographus* has been shown to display sex-specific responses to its  
292 pheromone components [42,43], so individual sexes were tested separately. Female  
293 beetles were significantly more attracted towards the individual aggregation pheromone  
294 components *cis*-verbenol and 2-methyl-3-buten-2-ol (*cis*-verbenol,  $z = 2.98$ ,  $p = 0.003$ ;  
295 2-methyl-3-buten-2-ol,  $z = 2$ ,  $p = 0.046$ , Wilcoxon's test), and towards a mixture of the  
296 two pheromone components ( $z = 5.19$ ,  $p < 0.001$ , Wilcoxon's test) compared to the  
297 mineral oil control (Fig 5A). By contrast, adult males did not make a significant choice  
298 between these options in accordance with previous studies [42, 61]. However, when  
299 beetles had to choose between the pheromone mixture with or without *G. penicillata*  
300 volatiles, females significantly preferred the pheromone mixture together with *G.*  
301 *penicillata* volatiles (Fig 5B) ( $z = 3.41$ ,  $p = 0.001$ , Wilcoxon's test). These results indicate  
302 that, in addition to male-produced pheromones, female beetles might also utilize  
303 fungus-produced oxygenated monoterpenes as cues to select suitable breeding sites  
304 that include a beneficial symbiotic fungus.

### 305 **Symbiotic fungi increase the tunneling of adult beetles**

306 We previously showed that the symbiotic fungi of *I. typographus* stimulate tunneling of  
307 adult bark beetles in fungus-colonized medium [40,44,45]. Here we investigated if the  
308 addition of specific spruce monoterpenes to medium colonized by *G. penicillata* had an  
309 effect on tunneling. Overall, the presence of a symbiotic fungus increased the tunneling

310 success of adult beetles after 48 h. Multiple logistic regression analysis revealed that  
311 successful tunneling odds in (-)-bornyl acetate-amended medium were significantly  
312 influenced by the fungus when the beetle sex and the monoterpene treatment remained  
313 constant (Table 1) ( $\beta = 4.98$ ,  $\chi^2 = 20.99$ ,  $p < 0.001$ ). The presence of the fungus  
314 increased the tunneling odds by 145 units (percentage probability increased by 99%)  
315 compared to in the absence of the fungus. Additionally, males had significantly lower  
316 tunneling success compared to females (Table 1) ( $\beta = -1.72$ ,  $\chi^2 = 8.78$ ,  $p = 0.003$ ) with  
317 the tunneling odds for males being 0.18 units lower (percentage probability decreased  
318 by 15.2%) than for females. In (-)- $\beta$ -pinene-amended medium, only the presence of the  
319 fungus significantly influenced the tunneling odds of beetles (Table 1) ( $\beta = 2.65$ ,  $\chi^2 =$   
320  $20.45$ ,  $p < 0.001$ ), with an increase of 14.06 units (percentage probability increased by  
321 93%) compared to in the absence of the fungus. Similarly, in (-)- $\alpha$ -pinene-amended  
322 medium only the presence of the fungus significantly influenced the tunneling odds of  
323 beetles (Table 1) ( $\beta = 2.02$ ,  $\chi^2 = 9.39$ ,  $p = 0.002$ ), with an increase of 7.51 units  
324 (percentage probability increased by 88%) compared to the absence of the fungus.  
325 Addition of the three monoterpenes without fungus did not have any effect on the  
326 tunneling behavior of adult beetles.

327 The growth of *G. penicillata* on monoterpene-enriched media resulted in  
328 significantly longer beetle tunnels than in the other treatments (Fig 6B-D) ((-)- $\beta$ -pinene,  
329  $F_{(3,99)} = 4.95$ ,  $p = 0.003$ ; (-)- $\alpha$ -pinene,  $F_{(3,92)} = 14.8$ ,  $p < 0.001$ ; (-)-bornyl acetate,  $F_{(3,106)}$   
330  $= 6.6$ ,  $p < 0.001$ , ANOVA, Tukey's test). However, there was no significant difference in  
331 tunnel lengths in treatments with fungus alone versus fungus plus monoterpenes except  
332 for the treatment with (-)- $\beta$ -pinene (Fig 6B-D, Tukey's test). The sex of the beetle and

333 the interaction of sex with other treatments had no effect on the tunnel length.  
334 Altogether, these results show that adult *I. typographus* recognize fungal volatiles  
335 produced by symbionts growing on spruce bark as positive cues that stimulate tunneling  
336 in the presence of fungus.

337

338

339

340

341

342

## 343 **Discussion**

344 The successful attack of bark beetles on their host trees is invariably associated with  
345 free-living fungal symbionts. These ascomycete symbionts may detoxify the terpene-  
346 rich defensive resin of the host tree, hasten host tree death, provide nutritional benefits,  
347 and increase resistance to pathogens, [20,21,26]. Here, we documented the ability of *I.*  
348 *typographus* fungal symbionts to metabolize host tree monoterpenes to oxygenated  
349 derivatives that may assist adult beetles in locating suitable breeding and feeding sites  
350 [38,46]. Several oxygenated monoterpenes have been previously identified as volatiles  
351 released from trees that were attacked by *I. typographus* [36,37,39]. We showed that  
352 these compounds were likely fungal metabolites that become dominant components of



353 the volatile profile of fungus-infected bark within 12 days following infection. Bark beetle  
354 olfactory sensory neurons could detect various oxygenated monoterpenes produced by  
355 symbiotic fungi, and we identified three neuron classes that primarily respond to these  
356 compounds. Major fungal-derived oxygenated monoterpenes attracted adult beetles  
357 and stimulated tunneling of beetles on diets inoculated with monoterpene-metabolizing  
358 fungal symbionts. The presence of the symbiont *G. penicillata* also increased the  
359 attraction of female beetles to the aggregation pheromone.

### 360 **Oxygenated monoterpenes are widespread volatile cues in tree-feeding insects**

361 Various forest insects that are associated with fungal symbionts, such as bark beetles,  
362 ambrosia beetles and wood wasps live in host trees producing large quantities of  
363 monoterpene volatiles. These insects are often attracted to their fungal symbionts  
364 through volatiles [6,40,47] and hence, fungal-produced monoterpene metabolites could  
365 be critical components of the attractive volatile blends. For bark beetles, oxygenated  
366 monoterpenes derived from either the beetles, fungi or host trees play many important  
367 roles in their life history [48]. During mass attacks, the host-derived oxygenated  
368 monoterpene *cis*-verbenol acts together with 2-methyl-3-buten-2-ol as an aggregating  
369 signal for *I. typographus* to promote mass attack on individual trees [32,49]. Beetles  
370 also utilize oxygenated monoterpenes to restrict the density of attack. Microbes lining  
371 the gallery walls or living in the beetle gut oxidize *cis* and *trans*-verbenol into verbenone,  
372 which inhibits the attraction of both sexes to fully colonized trees [50–52]. Furthermore,  
373 mated male beetles produce ipsenol and ipsdienol, of which ipsenol acts as an anti-  
374 attractant [52] and, an oxygenated monoterpene from host trees, 1,8-cineole, which is  
375 produced in higher amounts in resistant or MeJA-primed trees, inhibits attraction of

376 beetles to their pheromones [53–55]. Oxygenated monoterpenes are also used as  
377 reliable cues by parasitoids of bark beetles to locate their prey [39,56].

378 Here we discovered that oxygenated monoterpenes emitted by bark beetle-associated  
379 fungi growing on agar amended with spruce bark attracted adult *I. typographus*.  
380 Previously, we demonstrated that fungi grown on potato dextrose agar without any  
381 spruce bark *de novo* produced other volatiles, mixtures of aliphatic and aromatic  
382 compounds, that attract newly emerged (callow) adult beetles [40]. These compounds  
383 were also detected here as major components of the volatile blend at later phases of  
384 fungal growth (S3-7 Table). Although we focused principally on the symbiont *G.*  
385 *penicillata* in this study, volatiles from other fungal symbionts were also investigated.  
386 The congener *G. europheoides* and *E. polonica* were also found to emit volatile blends  
387 attractive to adult *I. typographus* when growing on spruce bark agar (Fig. S1), but the  
388 volatiles of *O. bicolor* and the saprophyte *O. piceae* were not attractive. Since all of  
389 these species produce oxygenated derivatives of spruce bark monoterpenes (Tables  
390 S2-7), it is not the simple presence of oxygenated monoterpenes, but the entire volatile  
391 profile that determines its attractiveness.

392 **Oxygenated monoterpenes signal the presence of fungi to bark beetles and so**  
393 **may modulate beetle colonization**

394 The first chemical signals reported to mediate bark beetle colonization of their hosts  
395 were aggregation pheromones. Yet even in the presence of these pheromones, a large  
396 proportion of aggregating beetles that land on trees leave without tunneling into the bark  
397 [46,57,58]. This suggests that other cues may be needed to induce beetles to stay and

398 bore into the bark. Indeed, bark beetles have been shown to respond to signals from  
399 host and non-host species when selecting trees for colonization [32,40,59–62]. Based  
400 on our results, fungus-produced oxygenated monoterpenes might also belong to the list  
401 of colonization cues. For bark beetles, fungal metabolites can serve as indicators of  
402 host tree sectors where their fungal symbionts are already established. These  
403 compounds also provide evidence for the ongoing metabolism of host tree defenses,  
404 which could improve the success of bark beetle colonization.

405 Fungal volatiles also enhance the attraction of bark beetles to aggregation pheromones.  
406 Female *I. typographus* are known to use the aggregation pheromone ( 2-methyl-3-  
407 buten-2-ol and *cis*-verbenol) to locate trees suitable for mating and oviposition [46,63].  
408 Here we showed that female *I. typographus* were more attracted at short range to a  
409 combination of pheromones plus fungal volatiles than to pheromones alone.  
410 Oxygenated monoterpenes and other fungal volatiles provide information about the  
411 presence of fungal symbionts, which promote the successful development of their  
412 offspring. Similarly, the pheromone component *cis*-verbenol, itself an oxygenated  
413 monoterpene produced by *I. typographus* from the host tree precursor  $\alpha$ -pinene [64],  
414 provides information about the presence of other beetles, especially mates. The lack of  
415 response of males to pheromones in our experiments is not unexpected, as male *I.*  
416 *typographus* have been reported to be less responsive than females to high doses of  
417 pheromones in walking bioassays [43,63]. This behavior may help them avoid dense  
418 colonies of male conspecifics within a tree to reduce competition for mates and food.

419 The oxygenated metabolites of host monoterpenes produced by fungal symbionts not  
420 only attracted bark beetles, but also stimulated them to tunnel in a fungal-colonized

421 medium. Interestingly, both sexes showed increased tunneling in contrast to their  
422 response to pheromones. The lack of differences in sex-specific responses could be  
423 due to the fact that the nutritional advantage of feeding on fungus colonized spruce bark  
424 medium is beneficial to both sexes [21,22].

425 The proportion of oxygenated monoterpenes to total monoterpenes in the volatile blend  
426 of *G. penicillata* increased over the time course studied to nearly 50% at 12 days and  
427 nearly 70% at 18 days, a trend also observed for *G. europhioides* and *O. bicolor*. Thus,  
428 higher proportions of these compounds may indicate older fungal infection sites and  
429 hence older beetle invasion sites that may be less attractive to newly arriving beetles  
430 due to crowding. The lack of attraction and even repellency of higher concentrations of  
431 individual oxygenated monoterpenes seen in laboratory bioassays in our and in  
432 previous studies is consistent with this interpretation [65]. In fact, one oxygenated  
433 monoterpene derivative has been already reported to inhibit *I. typographus* attraction.  
434 Verbenone, which is produced by microbial oxidation or auto-oxidation of the  
435 pheromone *cis*-verbenol, repels *I. typographus* in later phases of the attack cycle  
436 [52,66,67].

437 Oxygenated monoterpenes are signals not only for bark beetles, but also for their  
438 enemies. Both beetle predators and parasitoids employ these compounds and other  
439 volatiles to locate bark beetle larvae hidden under the bark [68]. Specifically, a three-  
440 component blend comprising camphor, isopinocampone and terpinen-4-ol, all fungal  
441 metabolites of host tree monoterpene hydrocarbons, was reported to attract a  
442 coleopteran predator and several hymenopteran parasitoids of *I. typographus* in the  
443 presence of host tree background signals [56,69,70]. A similar mechanism is used by

444 parasitoids of the wood wasp, *Sirex noctilio* to locate their concealed host insect under  
445 the bark via the volatiles from the wood wasp fungal symbiont *Amylostereum areolatum*  
446 [71]. Furthermore, the bark beetle predator, *Thanasimus formicarius* contains OSNs to  
447 detect oxygenated monoterpenes such as camphor and pinocamphone [72]. Thus, any  
448 benefit to the beetle arising from oxygenated monoterpene production by its symbiotic  
449 fungi may come at the cost of revealing its presence to natural enemies that employ  
450 these same volatiles to locate bark beetles.

#### 451 **Formation of oxygenated derivatives may reduce monoterpene toxicity for bark** 452 **beetles**

453 The conversion of host tree monoterpene defenses by symbiotic fungi to oxygenated  
454 products may alleviate toxicity to bark beetles. Terpene-rich resins are a general  
455 defense of *P. abies* and other conifers against herbivores and pathogens [4,73,74].  
456 Thus, it is not surprising that monoterpenes have exhibited toxicity to bark beetles in  
457 many studies [75–77]. Monoterpene hydrocarbons, such as  $\alpha$ -pinene are typically more  
458 toxic to beetles than host tree-produced oxygenated monoterpenes, such as bornyl  
459 acetate [78]. Hence the oxidative transformations carried out by fungal symbionts  
460 described in this study could reduce toxicity to *I. typographus* through conversion to less  
461 poisonous derivatives. Such detoxification of host tree defenses could represent a  
462 significant benefit of fungal symbionts [79].

463 By contrast, oxygenated monoterpenes may be more toxic for fungi than monoterpene  
464 hydrocarbons [80,81]. Thus, the initial oxidation of monoterpene hydrocarbons may not  
465 constitute a detoxification unless it is a step towards further metabolism. The potential

466 toxicity of oxygenated monoterpenes may explain why these substances are readily  
467 degraded by fungi specialized on conifers such as *G. penicillata*, *Heterobasidion*  
468 *parviporum* and *Seridium cardinale* [80,81]. The fungus *G. clavigera*, a symbiont of the  
469 bark beetle *Dendroctonus ponderosae*, possesses genes encoding cytochromes P450  
470 and other oxidative enzymes that are up-regulated by dietary monoterpenes [82,83]

471

### 472 **Other sources of oxygenated monoterpenes in spruce-bark beetle interactions**

473 Oxygenated monoterpenes emitted from trees attacked by *I. typographus* may arise  
474 from sources other than fungal symbionts. The host tree *P. abies* synthesizes large  
475 amounts of bornyl acetate [84] and small amounts of 1,8-cineole [85]. In these  
476 compounds, the oxygen functions are incorporated during biosynthesis from basic  
477 precursors, whereas the products from fungal symbionts are formed by oxidative  
478 modification of a previously formed monoterpene hydrocarbon skeleton. The compound  
479 *trans*-4-thujanol belongs to the latter group. We identified it as a *G. penicillata*  
480 metabolite of  $\alpha$ - and  $\beta$ -pinene, but *trans*-4-thujanol may also be synthesized by the tree,  
481 although at low levels in *P. abies* bark [65]. As another alternative, this and other  
482 oxygenated monoterpenes could be produced via autoxidation. The degradation of  
483 monoterpenes upon exposure to air could explain the release of low but readily  
484 detectible amounts of oxygenated monoterpenes from uninfected control bark plugs in  
485 our and other studies. In the field, oxygenated monoterpenes other than bornyl acetate  
486 and 1,8-cineole have been detected from damaged *P. abies* trees when monoterpenes  
487 were exposed to air [86,87]. However, in the present study the emission rate from

488 uninfected bark plugs was much lower than from fungus-infected plugs, suggesting that  
489 microbial metabolism is a much more significant source of oxygenated monoterpenes  
490 than autoxidation [88]. However, since *P. abies* cell suspension cultures have been  
491 reported to oxidize added monoterpenes [89,90] the tree itself cannot be ruled out as a  
492 source of any of the detected oxygenated monoterpenes.

493 Among microbial sources of oxygenated monoterpenes are several yeast species  
494 including *Hansenula holstii*, *H. capsulata* and *Candida nitratophila*, which were isolated  
495 from *I. typographus*, and produce terpinen-4-ol,  $\alpha$ -terpineol, borneol and *trans*-  
496 pinocarveol when grown in phloem medium or in  $\alpha$ -pinene-supplemented medium [67].  
497 In addition, another bark beetle species, *Polygraphus poligraphus*, which is sometimes  
498 found together with *I. typographus*, was shown to emit large amounts of terpinene-4-ol  
499 [91,92]. Intermediate amounts of  $\alpha$ -terpineol, *cis*- and *trans*-4-thujanol were also  
500 identified from the hindgut as well as the entrance holes of this beetle's gallery and  
501 could be formed by this beetle or its associated microorganisms from host tree  
502 monoterpenes.

### 503 **High selectivity of bark beetle olfactory neurons to oxygenated monoterpenes** 504 **suggest their role in detecting symbiotic fungi**

505 The bark beetles of *Ips typographus* possess several classes of olfactory sensory  
506 neurons (OSNs) that were shown to detect the oxygenated monoterpenes produced by  
507 their fungal symbionts with notable specificity. For example, the isopinocampone OSN  
508 showed high specificity towards several monoterpene ketones produced by fungal  
509 symbionts, including (+)- and (-)-isopinocampone, (+)- and (-)-pinocampone,

510 camphor, and pinocarvone, but not to monoterpene alcohols such as borneol and *trans*-  
511 pinocarveol. The absence of any response to monoterpene hydrocarbons indicates that  
512 this OSN is not tuned to detect the host tree itself, but rather organisms metabolizing  
513 the major host monoterpenes. The isopinocampone OSN is similar to one recently  
514 reported OSN class from *I. typographus* that responded best to pinocarvone and  
515 camphor (OSN class named Pcn; isopinocampone and pinocampone were not  
516 tested) [87]. Our work shows that (+)-isopinocampone is the primary ligand of this OSN  
517 class, based on its greater activity than the other active compounds. In addition, the  
518 response profile of this OSN class matches very well with that of the odorant receptor  
519 (OR) ItyOR29, which recently was characterized in *Xenopus laevis* oocytes [93].

520 Likewise, we showed that a previously described verbenone-sensitive OSN class [41]  
521 also responds to *cis*- and *trans*-verbenol and  $\beta$ -isophorone, compounds that are  
522 believed to arise from bark beetle metabolism of host tree terpenes [94]. Verbenone is  
523 produced from the verbenols by microbes that colonize gallery walls and beetle guts.  
524 Therefore, this OSN appears to be tuned to signals from various ecological sources  
525 providing information on bark beetle density as well as microbial establishment  
526 [46,51,86].

527 Another OSN class responded most sensitively to the monoterpene alcohol *trans*-4-  
528 thujanol, a fungal symbiont metabolite of  $\alpha$ - and  $\beta$ -pinene. This OSN also responded to  
529 the fungal metabolites terpinen-4-ol and  $\alpha$ -terpineol, as well as C<sub>8</sub> alcohols, but only at  
530 the highest doses tested, which extends prior results for this OSN [87] to other  
531 compounds from our greatly expanded test odor panel. Strong electroantennographic  
532 activity in *I. typographus* in response to these oxygenated monoterpenes has also been



533 reported [86,87], and the response spectrum of this OSN class matches well with that of  
534 the receptor ItypOR23, which is evolutionarily related to ItypOR29 detecting  
535 isopinocampone [93]. In the present study, fungal symbiont-produced oxygenated  
536 monoterpenes dominated the volatile profile of fungus-infected spruce bark and might  
537 thus indicate the defense status and degree of host colonization by fungus and beetles.  
538 However, the ecological relevance of oxygenated monoterpenes is likely to be context  
539 dependent, and many factors including the concentration of volatiles, blend ratios,  
540 timing of emission (early or late attack phase), as well as the nutritional state, age and  
541 sex of beetles, may determine the valence of these compounds.

## 542 **Conclusion**

543 We show that free-living fungal symbionts vectored by spruce bark beetles metabolize  
544 host tree monoterpene hydrocarbons to oxygenated derivatives as they infect the bark.  
545 These oxygenated volatile compounds serve as signals to indicate the establishment of  
546 fungi in beetle galleries and ultimately attract bark beetles and stimulate their tunneling.  
547 However, the roles of such fungal volatiles are context-dependent and can either attract  
548 or repel beetles depending on their concentrations, which reflect the physiological status  
549 of the microbes, the density of beetles and the stage of attack [40,95]. Since the  
550 ecological roles we have proposed for these oxygenated monoterpenes are based on  
551 laboratory assays with walking beetles, studies under natural conditions are necessary  
552 to confirm our findings. These compounds may also be useful in integrated pest  
553 management strategies as attractants or repellents of bark beetles perhaps in  
554 combination with pheromones [96–98]. In this way, microbial volatiles provide a rich

555 source of untapped insect semiochemicals that can be exploited for protecting forests  
556 from devastating pest species such as *I. typographus*.

557

558

559

## 560 **1 Materials and methods**

### 561 **1.1 Fungal strains and growth medium**

562 The fungal strains used in this study have been previously described [40] (listed in  
563 *Table S1*). In order to obtain spores from fungi, freshly inoculated PDA plates were  
564 incubated at room temperature for 15-20 d until the mycelium was old and dark. After 20  
565 d, plates were kept briefly at 4°C to induce sporulation. Four to six 1 cm diameter  
566 mycelium plugs were removed from each plate and inoculated into 20 mL potato  
567 dextrose broth and incubated at 25°C at 150 rpm for 4 days. Once the broth was turbid,  
568 the spores were filtered using a 40 µm EASYstrainer™ (Greiner Bio-One,  
569 Frickenhausen, Germany), and the filtrate was spun down at 4200 rcf for 10 min to  
570 precipitate the spores. The supernatant was discarded and the spore suspension was  
571 washed three times with autoclaved water and then stored at 4°C until used. The spore  
572 suspension prepared using this method was viable for several months when stored at  
573 4°C.

### 574 **1.2 Bark beetle rearing**

575 Bark beetles were reared and stored in the laboratory as described [40]. The starting  
576 beetle culture was obtained from an infested tree in October 2017 near Jena, Thuringia,  
577 Germany. Beetles were reared throughout the year in the laboratory in freshly cut  
578 spruce logs (ca. 30 cm diameter x 50 cm height) placed in an environmental chamber  
579 set at 25°C throughout the day, 65% relative humidity and a photoperiod of 20 h per  
580 day. Beetles emerged from breeding logs after ca. 35 days and were collected  
581 manually. Emerged adults were sexed based on the bristle density on their pronotum  
582 [99] and stored separately in Falcon tubes lined with moist paper at 4°C at least for a  
583 week before using them in bioassays. Adult beetles were used only once in bioassays.

### 584 **1.3 Spruce bark diet**

585 Spruce bark agar was prepared as follows: the outer bark of a freshly cut mature tree  
586 was scraped off gently using a drawing knife and the inner bark (phloem) was carefully  
587 peeled off using a chisel. The bark was cut into small pieces and ground to a fine  
588 powder in vibratory micro mill (Pulverisette 0, Fritsch GmbH, Idar-Oberstein, Germany).  
589 The instrument was pre-cooled with liquid nitrogen and bark pieces were pulverized at  
590 an amplitude of 2.0 for ca. 10 minutes with addition of liquid nitrogen every two minutes  
591 to prevent thawing. The ground powder was stored in Falcon tubes at -80°C until used  
592 for diet preparation. For preparing spruce bark diet, 7% powdered inner spruce phloem  
593 (w/v) was added to 4% Bactoagar (Roth) and heat sterilized at 121°C for 20 minutes.

### 594 **1.4 Identification and quantification of headspace volatiles of fungal symbionts**

595 Norway spruce bark plugs of approximately 28 mm diameter were removed from a  
596 freshly felled tree in July, 2017 and a single bark plug was placed inside a 250 mL

597 volatile collection glass bottle. Before removing the bark plugs, the surface of the bark  
598 and the cork borer were sterilized by thorough spraying with 70% ethanol in a laminar  
599 hood. An 100  $\mu\text{L}$  quantity of spore suspension ( $1 \times 10^6$  cells  $\text{mL}^{-1}$ ), prepared as described  
600 above, was added to the exposed section of the bark, and autoclaved water was added  
601 to the control treatment. Each treatment was replicated four times including the control.  
602 The glass bottle was secured tightly and incubated at  $25^\circ\text{C}$  for 4 days. After 4 d,  
603 activated charcoal-filtered air was passed into the bottle inlet at the rate of  $50 \text{ mL min}^{-1}$   
604 and the outlet air was funneled through a SuperQ adsorbent filter (150 mg) for 4 hours.  
605 Afterwards, the filters were eluted with 200  $\mu\text{L}$  dichloromethane spiked with 10 ng  $\mu\text{L}^{-1}$   
606 nonyl acetate (Sigma Aldrich) as an internal standard and stored at  $-20^\circ\text{C}$ . The spruce  
607 bark plugs were oven dried at  $80^\circ\text{C}$  for 6 hours after the experiment and the dry weight  
608 was measured.

609 The eluted volatile samples were subjected to GC-MS and GC-FID analysis using an  
610 Agilent 6890 series GC (Agilent, Santa Clara, CA, USA) (injection, 1  $\mu\text{L}$  splitless; flow, 2  
611  $\text{ml min}^{-1}$ ; temperature, 45 to  $180^\circ\text{C}$  at  $6^\circ\text{C min}^{-1}$  and then to  $300^\circ\text{C}$  at  $100^\circ\text{C min}^{-1}$  for 10  
612 min) coupled either to an Agilent 5973 quadrupole mass selective detector (interface  
613 temperature  $270^\circ\text{C}$ , quadrupole temperature  $150^\circ\text{C}$ , source temperature  $230^\circ\text{C}$ ;  
614 electron energy 70 eV) or a flame ionization detector (FID, temp.  $300^\circ\text{C}$ ). The  
615 constituents were separated on a DB-5MS column (Agilent (30 m x 0.25 mm x 0.25  
616  $\mu\text{m}$ )), with He (MS) or  $\text{H}_2$  (FID) as carrier gas. The identity of each peak was determined  
617 by comparing its mass spectra and retention times to those of reference libraries  
618 (NIST98 and Wiley275) and authentic standards. The amount of each compound was

619 calculated from the peak area obtained from the FID detector relative to the internal  
620 standard and standardized to the spruce bark dry weight.

### 621 **1.5 Time series headspace volatile collection**

622 For time series volatile analysis, spruce bark plugs (10 mm diameter) were removed  
623 using a cork borer from a freshly felled spruce tree in October, 2016. Each spruce bark  
624 plug was placed in a 15 mL clear glass vial (Supelco-Sigma-Aldrich) and 50  $\mu$ L spore  
625 suspension ( $1 \times 10^6$  cells  $\text{mL}^{-1}$ ), prepared as described above, was added to treatment  
626 plugs while control plugs received sterile water. The headspace volatiles were captured  
627 on three polydimethylsiloxane (PDMS) sorbent silicone tubes (0.5 cm), which were hung  
628 in each glass vial using a manually crafted metal hook attached to the bottom of  
629 PTFE/silicone septa in the screw cap [100]. The headspace volatiles were collected  
630 from each treatment for 2 h at 4, 8, 12 and 18 d after inoculation. After sampling,  
631 silicone tubes were placed in 1.5 mL brown glass vials and stored at  $-20^\circ\text{C}$  until  
632 analysis.

633 Volatiles collected on PDMS tubes were analyzed using a GC-2010 plus gas  
634 chromatograph coupled to a MS-QP2010 quadrupole mass spectrometer equipped with  
635 a TD-20 thermal desorption unit (Shimadzu, Japan) and a GC Cryo-Trap filled with  
636 Tenax. A single tube was placed in a 89  $\mu$ m glass thermal desorption tube and  
637 desorbed at a flow rate of 60  $\mu$ mL  $\text{min}^{-1}$  for 8  $\mu$ min at  $200^\circ\text{C}$  under a stream of  $\text{N}_2$   
638 gas. The desorbed substances were focused on a cryogenic trap at  $-20^\circ\text{C}$ . The Tenax  
639 adsorbent was heated to  $230^\circ\text{C}$  and the analytes were injected using split mode  
640 (1:100) onto a Rtx-5MS GC column (30  $\mu$  m x 0.25 mm x 0.25  $\mu$ m) with helium as

641 carrier gas. Compounds were identified as above (1.5) from authentic standards and  
642 libraries, and quantified from the area of each peak obtained using GC-MS post run  
643 analysis software from Shimadzu. The PLS-DA plot in Fig 2A was generated by using  
644 MetaboAnalyst 3.0 software with normalized GC-MS data (both log transformed, and  
645 range scaled) [101].

646

## 647 **1.6 Biotransformation of host tree compounds**

648 Experiments were conducted in 9 cm Petri dishes containing 2% potato dextrose agar  
649 (PDA) supplemented with test solutions. The tested compounds were (-)- $\alpha$ -pinene, (+)-  
650  $\alpha$ -pinene, (-)- $\beta$ -pinene, myrcene,  $\gamma$ -terpinene, terpinolene, sabinene, camphene, *p*-  
651 cymene, and (-)-bornyl acetate. Sources of these compounds are given in Table S1.  
652 Compounds were added after dissolving in dimethyl sulfoxide (DMSO). These were  
653 then added into PDA to reach a final concentration of 0.5 mg mL<sup>-1</sup> before pouring into  
654 Petri dishes. A 5 mm agar plug containing a fungal colony was placed in the center of  
655 each dish and incubated at 25°C in darkness for 6 d. Each treatment was replicated four  
656 times and for the control the PDA contained only DMSO plus monoterpene. The  
657 headspace volatiles were collected after 4d using three PDMS tubes, which were  
658 mounted on sterile metal wires and imbedded in PDA for one hour and stored at -20°C.  
659 The identification and quantification of compounds were conducted in the same way as  
660 reported for the time series (section 1.5). The headspace volatiles from fungus grown  
661 on PDA enriched with myrcene,  $\gamma$ -terpinene, terpinolene, camphene and *p*-cymene did  
662 not yield detectable amounts of monoterpene transformation products on analysis.

663 To identify if symbiotic fungi can reduce the amount of monoterpenes in their substrate,  
664 fungi were grown on PDA enriched with 0.5 mg g<sup>-1</sup> (-)- $\alpha$ -pinene, (+)- $\alpha$ -pinene, (-)- $\beta$ -  
665 pinene, and (-)-bornyl acetate as described above. Control plates contained only DMSO  
666 and the tested monoterpene. After 4 d, three plugs of 6 mm diameter were removed,  
667 weighed and transferred to 1.5 ml sterile glass vials. Agar plugs were homogenized  
668 using sterile plastic pestles and 1 ml hexane (extraction solvent) spiked with 10 ng  $\mu$ L<sup>-1</sup>  
669 nonyl acetate was added and samples were vortexed for 30 s. Supernatants were  
670 transferred to new vials and stored at -20°C until identification and quantification by GC-  
671 MS and GC-FID (1.4). Data analysis was identical to that reported above.

## 672 **1.7 Chemical synthesis of (+)-isopinocampone and $\beta$ -isophorone**

673 **(+)-isopinocampone** ((1*R*,2*R*,5*S*)-2,6,6-Trimethylbicyclo[3.1.1]heptan-3-one). A  
674 mixture of (1*R*,2*R*,3*R*,5*S*)-(-)-isopinocampheol (200 mg, 1.30 mmol, Sigma-Aldrich) and  
675 Dess-Martin-periodinane (825 mg, 1.95 mmol) in anhydrous CH<sub>2</sub>Cl<sub>2</sub> (15 mL) was stirred  
676 at room temperature for 1 hour, followed by the addition of water and sat. aq. NaHCO<sub>3</sub>  
677 solution. The mixture was extracted twice with methyl *t*-butyl ether. The organic phase  
678 was washed with brine, dried over anhydrous Na<sub>2</sub>SO<sub>4</sub> and concentrated *in vacuo*. The  
679 residue was purified by short-path chromatography using an SPE cartridge  
680 (Chromabond SiOH, 6 mL, 500 mg, Macherey-Nagel, *n*-hexane:EtOAc = 10:1) to yield  
681 (+)-isopinocampone (159 mg, 1.04 mmol, 80%). NMR measurements were carried out  
682 on a Bruker Avance AV-500HD spectrometer, equipped with a TCI cryoprobe using  
683 standard pulse sequences as implemented in Bruker Topspin ver. 3.6.1. (Bruker Biospin  
684 GmbH, Rheinstetten, Germany). Chemical shifts were referenced to the residual solvent  
685 signals of acetone-*d*<sub>6</sub> ( $\delta$ <sub>H</sub> 2.05/  $\delta$ <sub>C</sub> 29.84) or CDCl<sub>3</sub> ( $\delta$ <sub>H</sub> 7.26/  $\delta$ <sub>C</sub> 77.16), respectively.

686 <sup>1</sup>H-NMR (500 MHz, CDCl<sub>3</sub>) δ ppm: 2.64 (*ddd*, *J*=18.6/3.0/3.0 Hz, 1H), 2.62 (*dddd*,  
687 *J*=10.1/6.2/6.1/3.0 Hz, 1H), 2.52 (*bd*, *J*=18.6 Hz, 1H), 2.46 (*dq*, *J*=7.3/1.9 Hz, 1H), 2.12  
688 (*ddd*, *J*=9.1/6.1/3.0 Hz, 1H), 2.06 (*ddd*, *J*=6.2/6.2/1.9 Hz, 1H), 1.31 (*s*, 3H), 1.21 (*d*,  
689 *J*=7.3 Hz, 3H), 1.19 (*bd*, *J*=10.1 Hz, 1H), 0.88 (*s*, 3H). <sup>13</sup>C-NMR (125 MHz, CDCl<sub>3</sub>) δ  
690 ppm: 215.9, 51.7, 45.3, 45.1, 39.4, 39.1, 34.8, 27.4, 22.2, 17.3. GC-MS *t*<sub>R</sub>: 13.6 min. EI-  
691 MS (70 eV): *m/z* (%) 152 (14), 110 (15), 95 (44), 83 (89), 69 (97), 55 (100), 41(64).

692 **β-isophorone** (3,5,5-Trimethyl-3-cyclohexen-1-one). β-Isophorone was synthesized  
693 from α-isophorone (Acros Organics, Fair Lawn, NJ, USA) following published methods  
694 [102]. Since β-isophorone was very unstable during column chromatography, the  
695 compound was used for the bioassay without purification. The purity of β-Isophorone  
696 was 91% with 6% of α-isophorone as assessed by NMR analysis. <sup>1</sup>H-NMR (500 MHz,  
697 acetone-*d*<sub>6</sub>) δ ppm: 5.44 (*s*, 1H), 2.69 (*bs*, 2H), 2.27 (*s*, 2H), 1.70 (*bs*, 3H), 1.00 (*s*, 6H).  
698 <sup>13</sup>C-NMR (125 MHz, acetone-*d*<sub>6</sub>) δ ppm: 209.3, 133.0, 130.6, 53.6, 44.2, 36.9, 29.8,  
699 22.8. GC-MS *t*<sub>R</sub>: 10.3 min. EI-MS (70 eV): *m/z* (%) 138 (69), 123 (68), 96 (99), 95 (84),  
700 81 (100).

701 Purity of the synthesized compounds was also determined using the following GC-MS  
702 program: injection, 1 μl splitless; flow, 2 ml min<sup>-1</sup>; temperature, 45 °C (held for 2 min) to  
703 250 °C with 6 °C min<sup>-1</sup>.

## 704 1.7 Electrophysiology

705 Laboratory reared adult beetles from the same German culture that were used in  
706 bioassays were used for electrophysiological single sensillum recordings (SSR) using  
707 tungsten microelectrodes according to established methodology [40,41], using the SSR



708 set-up (Syntech, Kirchzarten, Germany) and odor delivery system previously described  
709 [103]. The odor panel comprising 92 compounds consisted of beetle pheromones, host  
710 tree, non-host tree and fungal compounds ([40], Table S2). Both major and minor  
711 fungal volatiles identified during the chemical analysis were included in the odor panel.  
712 All odors were dissolved in odorless paraffin oil (w/v). SSR traces were analyzed as  
713 described [97] using Autospike 3.0 (Syntech). Males and females were initially screened  
714 for responses to the odor panel using a high stimulus dose (10 µg on filter paper placed  
715 inside capped standard Pasteur pipette odor cartridges [103]. OSN classes shown to  
716 primarily respond to fungus-derived oxygenated monoterpenes were subsequently  
717 studied in dose-response experiments with active stimuli diluted in ten-fold steps and  
718 tested from lowest to highest dose with the least active ligands tested first at each dose.  
719 To reduce variation due to odor depletion, stimulus cartridges were used for a maximum  
720 of 8 stimulations during screening and 2 stimulations during dose-response tests [104].

## 721 **1.8 Trap bioassay**

722 The trap bioassay used in this study has been described previously [40]. The setup was  
723 designed so that adult beetles had to make their choice through olfaction and not by  
724 contact cues. Fungi were inoculated on spruce bark agar-based diet and incubated at  
725 25°C for 4 days. With the help of a cork borer (10 mm diameter), bark plugs with or  
726 without fungus were inserted into circular cups (1.8 cm height \* 1.8 cm diameter) facing  
727 each other. Two beetles were placed inside each arena and the olfactometer was  
728 placed inside a laminar flow cabinet in darkness. Each experiment was replicated at  
729 least 25 times with 2 beetles per replicate. The choice of beetles was determined  
730 periodically for up to six hours by counting the number of beetles trapped inside the

731 cups and represented as percentage choice (percentage of insects responding to either  
732 control traps or treatment traps or no response). Preliminary experiments showed that  
733 the sex of the beetle did not influence the olfactory response towards fungus grown  
734 either alone or in the diet enriched with monoterpenes. Therefore, two beetles were  
735 randomly chosen for trap bioassays.

736 For bioassays using terpenes, stock solutions were prepared by dissolving the  
737 compounds in DMSO, which were then added to 7% spruce bark agar to a final  
738 concentration of 0.05 to 1 mg g<sup>-1</sup>. To determine the response of adult beetles to (-)-β-  
739 pinene and (-)-bornyl acetate amended diet containing the fungus, *G. penicillata* was  
740 used as this species emitted higher amounts of biotransformation products compared to  
741 other fungi. Controls were treated with DMSO plus monoterpene (no fungus) or DMSO  
742 plus *G. penicillata* (no monoterpene). 7% spruce bark agar plugs (10 mm)  
743 supplemented with monoterpenes or plugs containing *G. penicillata* were placed in the  
744 control cups, and *G. penicillata* colonized plugs from monoterpene-enriched medium  
745 were placed in the treatment cups. The volatile emission from each control and  
746 treatment plug used in the bioassays was determined using PDMS tubes as adsorbents  
747 and analyzed as described previously (section 1.5). For bioassays with synthetic  
748 compounds, stock solutions of authentic standards were prepared by dissolving them in  
749 mineral oil (w/v) and further diluted in log<sub>10</sub> steps by dissolving in mineral oil. 10 μL was  
750 applied to 10 mm Whatmann filter paper laid on the top of spruce bark agar plugs  
751 placed inside the cups. Control traps were treated with 10 μL paraffin oil. For the  
752 experiment with pheromone blend in the presence of *G. penicillata* volatiles, *G.*  
753 *penicillata* colonized spruce bark plugs were placed in treatment cups and 10 μL of a

754 pheromone mixture (*cis*-verbenol:2-methyl-3-buten-2-ol in the ratio of 1:50 diluted 1:100  
755 in paraffin oil) was applied to filter paper as described above. Control cups were treated  
756 with 10  $\mu$ L of the pheromone mixture.

### 757 **1.10 Tunneling behavior bioassay**

758 Bark beetle tunneling behavior was assayed in 35  $\times$ 10 mm Petri dishes (Greiner Bio-  
759 one, Frickenhausen, Germany) filled with ca. 3 ml of spruce bark diet. The spruce  
760 bark diet was prepared as before with some modifications: 7% (w/v) spruce inner  
761 bark powder was mixed with 1% fibrous cellulose (Sigma), 2% glucose (Roth), and  
762 4% Bactoagar (Roth) in water and autoclaved for 20 minutes at 121  $^{\circ}$ C. Before  
763 pouring the medium into the Petri dishes, the medium was mixed with 2% solvent  
764 (DMSO: ethanol, 1:1) with 1 mg  $g^{-1}$  of various monoterpenes ((-)- $\alpha$ -pinene, (-)- $\beta$ -  
765 pinene and (-)-bornyl acetate) and solvent only as a control. For treatment with  
766 fungus, 5  $\mu$ l spore suspension of *G. penicillata* ( $1 \times 10^6$  cells  $mL^{-1}$ ) was added to the  
767 center of Petri dishes containing monoterpene-enriched media or solvent controls  
768 and incubated at 25 $^{\circ}$ C for 4 days. A single beetle was introduced per plate, and the  
769 plates were sealed with Parafilm and kept in the environmental chamber for 48 h  
770 under conditions described above (section 1.2). The beetles were monitored for their  
771 tunneling activity after 2, 4, 6, 24 and 48 h with tunneling recorded as a binary event.  
772 If beetles were inside the media, it was noted as 1 and if outside, noted as 0. After 48  
773 h, tunnel lengths made by beetles in each plate were measured using Image J  
774 software. Each treatment was replicated with 15 male and female beetles.

### 775 **1.11 Data analysis**

776 IBM SPSS Statistics V25.0 was used to analyze the volatile differences between  
777 treatments (*E. polonica*-, *G. penicillata*-, *G. europhioides*-, *O. bicolor*-, and *O. piceae*  
778 treated bark samples and untreated control). Data were log-transformed to meet the  
779 assumptions of normal distribution, as needed. All individual compounds assigned to  
780 monoterpenes (MTs) or oxygenated monoterpenes were combined and their  
781 concentrations (in dry weight ( $\text{ng h}^{-1} \text{mg}^{-1}$ )) were subjected to a t-test for estimating  
782 differences between control and *G. penicillata* (Fig. 2). Additionally, separate  
783 ANOVAs for all individual compounds in each group were also performed (Table S2).  
784 For volatile time course samples, a separate ANOVA test was performed for all  
785 individual compounds and compound groups from each fungus with time intervals as  
786 an independent factor (Table S3-7). All ANOVA tests were followed by Tukey's *post-*  
787 *hoc* tests to test for differences among treatment combinations. For behavioral  
788 bioassays, the CI values from each experimental group were analyzed by Wilcoxon's  
789 signed ranked test to compare the differences between control and treatment  
790 samples. Binary data from bark beetle tunneling assays were subjected to multiple  
791 logistic regression to analyze independent variables such as monoterpene, sex, and  
792 fungus that influence the tunneling activity of beetles (dependent variable) in the  
793 medium. During data analysis, the male was coded as 1 and female as 0, the  
794 presence of fungus coded as 1 and absence of fungus as 0, tunneling inside the  
795 medium coded as 1 and not tunneling or staying outside the medium as 0. After  
796 testing all possible independent variables and their interactions among them, the  
797 following best-fitted logistic regression model was created to predict the odds of  
798 beetles tunneling in the different media.

799  $\ln [\text{odds}] (\text{tunneling odds}) = \beta_0 + \beta_1 * \text{compound} + \beta_2 * \text{sex} + \beta_3 * \text{fungus}$

800 Here,  $\beta_0$  is constant whereas  $\beta_1$ ,  $\beta_2$ , and  $\beta_3$  are logistic coefficients or estimates for the  
801 parameters for compound, sex and fungus respectively. The strength of association  
802 between beetle tunneling odds and effect of monoterpenes or sex or fungus is  
803 expressed as odds ratios ( $OR = \exp^{\beta}$ ) where  $OR < 1$  indicates a negative relationship  
804 between the two events, i.e., the tunneling event is less likely to happen in response to  
805 a selected independent variable (coded as 1) in comparison with its base group (coded  
806 as 0),  $OR = 1$  indicates no relationship between two events,  $OR > 1$  shows positive  
807 relationship between two events.

## 808 **Acknowledgements**

809 We thank Bettina Raguschke, Emily Puckett and Daniel Veit for their assistance in the  
810 laboratory. We are grateful for the support of Stefan Engeter from ThüringenForst for  
811 permitting us to harvest spruce trees for the purpose of maintaining beetle culture in  
812 laboratory. We also thank Jothi Kumar Yuvaraj for his assistance in single sensillum  
813 recordings, and Christian Schiebe, Rikard Unelius, and Fredrik Schlyter for providing  
814 some of the stimuli used in SSR.

## 815 **Funding Disclosure**

816 Financial support was provided by the Max Planck society to DK, RZ, YN, HH, AH and  
817 JG. MNA acknowledges funding from the Swedish Research Council FORMAS (grants  
818 #217-2014-689 and #2018-01444) the Crafoord foundation, and the Royal

819 Physiographic Society in Lund. The funders had no role in study design, data collection  
820 and analysis, decision to publish and writing.

## 821 **Competing Interests**

822 I have read the journal's policy and I declare that the authors of this manuscript have no  
823 competing interests.

## 824 **Author Contributions**

825 **Conceptualization:** Dineshkumar Kandasamy, Martin N Andersson, Almuth  
826 Hammerbacher, Jonathan Gershenzon

827 **Data Curation:** Dineshkumar Kandasamy

828 **Formal Analysis:** Dineshkumar Kandasamy, Rashaduz Zaman

829 **Funding Acquisition:** Jonathan Gershenzon, Martin N Andersson

830 **Investigation:** Dineshkumar Kandasamy, Rashaduz Zaman, Yoko Nakamura, Tao  
831 Zhao

832 **Methodology:** Dineshkumar Kandasamy, Martin N Andersson

833 **Project Administration:** Dineshkumar Kandasamy, Martin N Andersson, Almuth  
834 Hammerbacher, Jonathan Gershenzon

835 **Resources:** Henrik Hartmann, Martin N Andersson, Jonathan Gershenzon

836 **Supervision:** Dineshkumar Kandasamy, Martin N Andersson, Almuth Hammerbacher,  
837 Jonathan Gershenzon

838 **Validation:** Dineshkumar Kandasamy

839 **Visualization:** Dineshkumar Kandasamy

840 **Writing – Original Draft Preparation:** Dineshkumar Kandasamy

841 **Writing – Review & Editing:**, Jonathan Gershenzon, Almuth Hammerbacher, Martin N  
842 Andersson, Henrik Hartmann

## 843 **References**

- 844 1. Turlings TCJ, Erb M. Tritrophic interactions mediated by herbivore-induced plant  
845 volatiles: mechanisms, ecological relevance, and application potential. *Annual*  
846 *Review of Entomology*. 2018;63: 433–452. doi:10.1146/annurev-ento-020117-  
847 043507
- 848 2. Paré PW, Tumlinson JH. Plant volatiles as a defense against insect herbivores.  
849 *Plant Physiology*. 1999;121: 325–331. doi:10.1104/pp.121.2.325
- 850 3. Bruce TJA, Wadhams LJ, Woodcock CM. Insect host location: A volatile situation.  
851 *Trends in Plant Science*. 2005;10: 269–274. doi:10.1016/j.tplants.2005.04.003
- 852 4. Gershenzon J, Dudareva N. The function of terpene natural products in the  
853 natural world. *Nature Chemical Biology*. 2007;3: 408–414.  
854 doi:10.1038/nchembio.2007.5
- 855 5. Becher PG, Flick G, Rozpedowska E, Schmidt A, Hagman A, Lebreton S, et al.  
856 Yeast, not fruit volatiles mediate *Drosophila melanogaster* attraction, oviposition  
857 and development. Thompson K, editor. *Functional Ecology*. 2012;26: 822–828.  
858 doi:10.1111/j.1365-2435.2012.02006.x
- 859 6. Hulcr J, Mann R, Stelinski LL. The scent of a partner: ambrosia beetles are  
860 attracted to volatiles from their fungal symbionts. *Journal of Chemical Ecology*.  
861 2011;37: 1374–1377. doi:10.1007/s10886-011-0046-x

- 862 7. Buser CC, Newcomb RD, Gaskett AC, Goddard MR. Niche construction initiates  
863 the evolution of mutualistic interactions. *Bonsall M, editor. Ecology Letters.*  
864 2014;17: 1257–1264. doi:10.1111/ele.12331
- 865 8. Biedermann PHW, Kaltenpoth M. New Synthesis: The chemistry of partner choice  
866 in insect-microbe mutualisms. *Journal of Chemical Ecology.* 5 Feb 2014;40: 99.  
867 doi:10.1007/s10886-014-0382-8
- 868 9. Archetti M, Scheuring I, Hoffman M, Frederickson ME, Pierce NE, Yu DW.  
869 Economic game theory for mutualism and cooperation. *Ecology Letters.*  
870 *Wiley/Blackwell* (10.1111); 2011. 1300–1312. doi:10.1111/j.1461-  
871 0248.2011.01697.x
- 872 10. Six DL. Niche construction theory can link bark beetle-fungus symbiosis type and  
873 colonization behavior to large scale causal chain-effects. *Current Opinion in*  
874 *Insect Science.* 2020;39: 27–34. doi:10.1016/j.cois.2019.12.005
- 875 11. Dweck HKM, Ebrahim SAM, Farhan A, Hansson BS, Stensmyr MC. Olfactory  
876 proxy detection of dietary antioxidants in *Drosophila*. *Current Biology.* 2015;25:  
877 455–466. doi:10.1016/j.cub.2014.11.062
- 878 12. Wermelinger B. Ecology and management of the spruce bark beetle *Ips*  
879 *typographus*—a review of recent research. *Forest Ecology and Management.*  
880 2004;202: 67–82. doi:10.1016/j.foreco.2004.07.018
- 881 13. Raffa KF, Aukema BH, Bentz BJ, Carroll AL, Hicke JA, Turner MG, et al. Cross-  
882 scale drivers of natural disturbances prone to anthropogenic amplification: the  
883 dynamics of bark beetle eruptions. *BioScience.* 2008;58: 501–517.  
884 doi:10.1641/B580607
- 885 14. Huang J, Kautz M, Trowbridge AM, Hammerbacher A, Raffa KF, Adams HD, et al.  
886 Tree defence and bark beetles in a drying world: carbon partitioning, functioning  
887 and modelling. *New Phytologist.* 2020;225: 26–36. doi:10.1111/nph.16173
- 888 15. Biedermann PHW, Müller J, Grégoire JC, Gruppe A, Hagge J, Hammerbacher A,  
889 et al. Bark beetle population dynamics in the anthropocene: challenges and  
890 solutions. *Trends in Ecology and Evolution.* Elsevier Current Trends; 2019. 914–  
891 924. doi:10.1016/j.tree.2019.06.002
- 892 16. Netherer S, Kandasamy D, Jirosová A, Kalinová B, Schebeck M, Schlyter F.  
893 Interactions among Norway spruce, the bark beetle *Ips typographus* and its fungal  
894 symbionts in times of drought. *Journal of Pest Science.* 2021.  
895 doi:10.1007/s10340-021-01341-y
- 896 17. Raffa KF, Grégoire JC, Lindgren BS. Natural history and ecology of bark beetles.  
897 bark beetles: biology and ecology of native and invasive species. *Academic*  
898 *Press;* 2015. 1–40. doi:10.1016/B978-0-12-417156-5.00001-0



- 899 18. Kirisits T. Fungal associates of European bark beetles with special emphasis on  
900 the ophiostomatoid fungi. Bark and wood boring insects in living trees in Europe,  
901 a synthesis. Springer; 2007. 181–236.
- 902 19. Linnakoski R, Wilhelm de Beer ZB, Niemelä P, Wingfield MJ. Associations of  
903 conifer-infesting bark beetles and fungi in Fennoscandia. *Insects*. 2012. 200–227.  
904 doi:10.3390/insects3010200
- 905 20. Six DL, Wingfield MJ. The role of phytopathogenicity in bark beetle–fungus  
906 symbioses: A challenge to the classic paradigm. *Annual Review of Entomology*.  
907 2011;56: 255–272. doi:10.1146/annurev-ento-120709-144839
- 908 21. Six DL. Ecological and evolutionary determinants of bark beetle - Fungus  
909 symbioses. *Insects*. 2012. doi:10.3390/insects3010339
- 910 22. Six DL. The bark beetle holobiont: Why microbes matter. *Journal of Chemical  
911 Ecology*. 2013;39: 989–1002. doi:10.1007/s10886-013-0318-8
- 912 23. Wadke N, Kandasamy D, Vogel H, Lah L, Wingfield BD, Paetz C, et al. Catechol  
913 dioxygenases catalyzing the first step in Norway spruce phenolic degradation are  
914 key virulence factors in the bark beetle-vectored fungus *Endoconidiophora*  
915 *polonica*. *Plant Physiology*. 2016;171: pp.01916.2015. doi:10.1104/pp.15.01916
- 916 24. Boone CK, Keefover-Ring K, Mapes AC, Adams AS, Bohlmann J, Raffa KF.  
917 Bacteria associated with a tree-killing insect reduce concentrations of plant  
918 defense compounds. *Journal of Chemical Ecology*. 2013;39: 1003–1006.  
919 doi:10.1007/s10886-013-0313-0
- 920 25. Six DL, Elser JJ. Extreme ecological stoichiometry of a bark beetle–fungus  
921 mutualism. *Ecological Entomology*. 2019;44: 543–551. doi:10.1111/een.12731
- 922 26. François L, Annie Y, Aurélien S. Stimulation of defenses by Ophiostomatoid fungi  
923 can explain attack success of bark beetles on conifers. *Annals of Forest Science*.  
924 2009;66: 1–22. doi:10.1051/forest/2009066
- 925 27. Krokene P. Conifer defense and resistance to bark beetles. *Bark beetles*.  
926 Elsevier; 2015. 177–207. doi:10.1016/B978-0-12-417156-5.00005-8
- 927 28. Raffa KF, Berryman AA. The role of host plant resistance in the colonization  
928 behavior and ecology of bark beetles (Coleoptera: Scolytidae). *Ecological  
929 Monographs*. 1983;53: 27–49. doi:10.2307/1942586
- 930 29. Phillips MA, Croteau RB. Resin-based defenses in conifers. *Trends in Plant  
931 Science*. 1999;4: 184–190. doi:10.1016/S1360-1385(99)01401-6
- 932 30. Klepzig KD, Smalley EB, Raffa KF. Combined chemical defenses against an  
933 insect-fungal complex. *Journal of Chemical Ecology*. 1996;22: 1367–1388.  
934 doi:10.1007/BF02027719

- 935 31. Raffa KF. Terpenes tell different tales at different scales: Glimpses into the  
936 chemical ecology of conifer - bark beetle - microbial interactions. *Journal of*  
937 *Chemical Ecology*. 2014;40: 1–20. doi:10.1007/s10886-013-0368-y
- 938 32. Raffa KF, Andersson MN, Schlyter F. Host selection by bark beetles: Playing the  
939 odds in a high-stakes game. *Advances in Insect Physiology*. 2016. 1–74.  
940 doi:10.1016/bs.aiip.2016.02.001
- 941 33. Klimetzek D, Francke W. Relationship between the enantiomeric composition of  
942  $\alpha$ -pinene in host trees and the production of verbenols in *Ips* species. *Experientia*.  
943 1980;36: 1343–1345. doi:10.1007/BF01960087
- 944 34. Lanne BS, Ivarsson P, Johnsson P, Bergström G, Wassgren AB. Biosynthesis of  
945 2-methyl-3-buten-2-ol, a pheromone component of *Ips typographus* (Coleoptera:  
946 Scolytidae). *Insect Biochemistry*. 1989;19: 163–167. doi:10.1016/0020-  
947 1790(89)90087-5
- 948 35. Bakke A, Frøyen P, Skattebøl L. Field response to a new pheromonal compound  
949 isolated from *Ips typographus*. *Naturwissenschaften*. 1977;64: 98–99.  
950 doi:10.1007/BF00437364
- 951 36. Leufvén A, Birgersson G. Quantitative variation of different monoterpenes around  
952 galleries of *Ips typographus* (Coleoptera: Scolytidae) attacking Norway spruce.  
953 *Canadian Journal of Botany*. 1987;65: 1038–1044. doi:10.1139/b87-144
- 954 37. Birgersson G, Leufvén A. The influence of host tree response to *Ips typographus*  
955 and fungal attack on production of semiochemicals. *Insect Biochemistry*. 1988;18:  
956 761–770. doi:10.1016/0020-1790(88)90098-4
- 957 38. Birgersson G, Bergström G. Volatiles released from individual spruce bark beetle  
958 entrance holes: Quantitative variations during the first week of attack. *Journal of*  
959 *Chemical Ecology*. 1989;15: 2465–2483. doi:10.1007/BF01020377
- 960 39. Pettersson EM, Boland W. Potential parasitoid attractants, volatile composition  
961 throughout a bark beetle attack. *Chemoecology*. 2003;13: 27–37.  
962 doi:10.1007/s000490300003
- 963 40. Kandasamy D, Gershenzon J, Andersson MN, Hammerbacher A. Volatile organic  
964 compounds influence the interaction of the Eurasian spruce bark beetle (*Ips*  
965 *typographus*) with its fungal symbionts. *ISME Journal*. 2019;13: 1788–1800.  
966 doi:10.1038/s41396-019-0390-3
- 967 41. Andersson MN, Larsson MC, Schlyter F. Specificity and redundancy in the  
968 olfactory system of the bark beetle *Ips typographus*: Single-cell responses to  
969 ecologically relevant odors. *Journal of Insect Physiology*. 2009;55: 556–567.  
970 doi:10.1016/j.jinsphys.2009.01.018

- 971 42. Schlyter F, Byers JA, Löfqvist J. Attraction to pheromone sources of different  
972 quantity, quality, and spacing: Density-regulation mechanisms in bark beetle *Ips*  
973 *typographus*. *Journal of Chemical Ecology*. 1987;13: 1503–1523.  
974 doi:10.1007/BF01012294
- 975 43. Schlyter F, Löfqvist J. Response of walking spruce bark beetles *Ips typographus*  
976 to pheromone produced in different attack phases. *Entomologia Experimentalis et*  
977 *Applicata*. 1986;41: 219–230. doi:10.1111/j.1570-7458.1986.tb00532.x
- 978 44. Zhao T, Kandasamy D, Krokene P, Chen J, Gershenzon J, Hammerbacher A.  
979 Fungal associates of the tree-killing bark beetle, *Ips typographus*, vary in  
980 virulence, ability to degrade conifer phenolics and influence bark beetle tunneling  
981 behavior. *Fungal Ecology*. 2018; 1–9. doi:10.1016/j.funeco.2018.06.003
- 982 45. Tanin SM, Kandasamy D, Krokene P. Fungal interactions and host tree  
983 preferences in the spruce bark beetle *Ips typographus*. *Frontiers in Microbiology*.  
984 2021;12: 695167. doi:10.3389/fmicb.2021.695167
- 985 46. Byers JA. Behavioral mechanisms involved in reducing competition in bark  
986 beetles. *Ecography*. 1989;12: 466–476. doi:10.1111/j.1600-0587.1989.tb00924.x
- 987 47. Fernández Ajó AA, Martínez AS, Villacide JM, Corley JC. Behavioural response  
988 of the woodwasp *Sirex noctilio* to volatile emissions of its fungal symbiont. *Journal*  
989 *of Applied Entomology*. 2015;139: 654–659. doi:10.1111/jen.12211
- 990 48. Francke W, P. Vité J. Oxygenated terpenes in pheromone systems of bark  
991 beetles. *Zeitschrift für Angewandte Entomologie*. 1983;96: 146–156.  
992 doi:10.1111/j.1439-0418.1983.tb03655.x
- 993 49. Schlyter F, Birgersson G, Byers JA, Löfqvist J, Bergström G. Field response of  
994 spruce bark beetle, *Ips typographus*, to aggregation pheromone candidates.  
995 *Journal of Chemical Ecology*. 1987;13: 701–716. doi:10.1007/BF01020153
- 996 50. Leufvén A, Bergström G, Falsen E. Interconversion of verbenols and verbenone  
997 by identified yeasts isolated from the spruce bark beetle *Ips typographus*. *Journal*  
998 *of Chemical Ecology*. 1984;10: 1349–1361. doi:10.1007/BF00988116
- 999 51. Cale JA, Ding R, Wang F, Rajabzadeh R, Erbilgin N. Ophiostomatoid fungi can  
1000 emit the bark beetle pheromone verbenone and other semiochemicals in media  
1001 amended with various pine chemicals and beetle-released compounds. *Fungal*  
1002 *Ecology*. 2019;39: 285–295. doi:10.1016/j.funeco.2019.01.003
- 1003 52. Schlyter F, Birgersson G, Leufvén A. Inhibition of attraction to aggregation  
1004 pheromone by verbenone and ipsenol - Density regulation mechanisms in bark  
1005 beetle *Ips typographus*. *Journal of Chemical Ecology*. 1989;15: 2263–2277.  
1006 doi:10.1007/BF01014114

- 1007 53. Schiebe C, Hammerbacher A, Birgersson G, Witzell J, Brodelius PE, Gershenson  
1008 J, et al. Inducibility of chemical defenses in Norway spruce bark is correlated with  
1009 unsuccessful mass attacks by the spruce bark beetle. *Oecologia*. 2012;170: 183–  
1010 198. doi:10.1007/s00442-012-2298-8
- 1011 54. Andersson MN, Larsson MC, Blazenec M, Jakus R, Zhang Q-H, Schlyter F.  
1012 Peripheral modulation of pheromone response by inhibitory host compound in a  
1013 beetle. *Journal of Experimental Biology*. 2010;213: 3332–3339.  
1014 doi:10.1242/jeb.044396
- 1015 55. Binyameen M, Jankuvová J, Blaženec M, Jakuš R, Song L, Schlyter F, et al. Co-  
1016 localization of insect olfactory sensory cells improves the discrimination of closely  
1017 separated odour sources. Fox C, editor. *Functional Ecology*. 2014;28: 1216–  
1018 1223. doi:10.1111/1365-2435.12252
- 1019 56. Pettersson EM. Volatile attractants for three Pteromalid parasitoids attacking  
1020 concealed spruce bark beetles. *Chemoecology*. 2001;11: 89–95.  
1021 doi:10.1007/PL00001837
- 1022 57. Toffin E, Gabriel E, Louis M, Deneubourg JL, Grégoire JC. Colonization of  
1023 weakened trees by mass-attacking bark beetles: No penalty for pioneers,  
1024 scattered initial distributions and final regular patterns. *Royal Society Open  
1025 Science*. 2018;5. doi:10.1098/rsos.170454
- 1026 58. Paynter QE, Anderbrant O, Schlyter F. Behavior of male and female spruce bark  
1027 beetles, *Ips typographus*, on the bark of host trees during mass attack. *Journal of  
1028 Insect Behavior*. 1990;3: 529–543. doi:10.1007/BF01052016
- 1029 59. Erbilgin N, Krokene P, Kvamme T, Christiansen E. A host monoterpene  
1030 influences *Ips typographus* (Coleoptera: Curculionidae, Scolytinae) responses to  
1031 its aggregation pheromone. *Agricultural and Forest Entomology*. 2007;9: 135–  
1032 140. doi:10.1111/j.1461-9563.2007.00329.x
- 1033 60. Zhang Q. Interruption of aggregation pheromone in *Ips typographus* (L.)(Col.  
1034 Scolytidae) by non-host bark volatiles. *Agricultural and Forest Entomology*.  
1035 2003;5: 145–153.
- 1036 61. Andersson MN. Mechanisms of odor coding in coniferous bark beetles: From  
1037 neuron to behavior and application. *Psyche J Entomol*. 2012.  
1038 doi:10.1155/2012/149572
- 1039 62. Andersson MN, Löfstedt C, Newcomb RD. Insect olfaction and the evolution of  
1040 receptor tuning. *Frontiers in Ecology and Evolution*. 2015;3: 53.  
1041 doi:10.3389/fevo.2015.00053
- 1042 63. Byers JA. Chemical ecology of bark beetles. *Experientia (Basel)*. 1989;45: 271–  
1043 283.

- 1044 64. Renwick JA, Hughes PR, Krull IS. Selective production of *cis*- and *trans*-verbenol  
1045 from (-)-and (+)-alpha pinene by a bark beetle. *Science*. 1976;191: 199 LP – 201.  
1046 doi:10.1126/science.1246609
- 1047 65. Blažytė-Čereškienė L, Apšegaitė V, Radžiutė S, Mozūraitis R, Būda V, Pečiulytė  
1048 D. Electrophysiological and behavioural responses of *Ips typographus* (L.) to  
1049 *trans*-4-thujanol—a host tree volatile compound. *Annals of Forest Science*.  
1050 2016;73: 247–256. doi:10.1007/s13595-015-0494-5
- 1051 66. Kopper BJ, Klepzig KD, Raffa KF. Components of antagonism and mutualism in  
1052 *Ips pini*–fungal interactions: relationship to a life history of colonizing highly  
1053 stressed and dead trees. *Environmental Entomology*. 2004;33: 28–34.  
1054 doi:10.1603/0046-225X-33.1.28
- 1055 67. Leufvén A, Bergström G, Falsen E. Oxygenated monoterpenes produced by  
1056 yeasts, isolated from *Ips typographus* (Coleoptera: Scolytidae) and grown in  
1057 phloem medium. *Journal of Chemical Ecology*. 1988;14: 353–362.  
1058 doi:10.1007/BF01022551
- 1059 68. Boone CK, Six DL, Zheng Y, Raffa KF. Parasitoids and dipteran predators exploit  
1060 volatiles from microbial symbionts to locate bark beetles. *Environmental*  
1061 *Entomology*. 2008;37: 150–161. doi:10.1603/0046-  
1062 225X(2008)37[150:PADPEV]2.0.CO;2
- 1063 69. Grégoire JC, Couillien D, Krebber R, König WA, Meyer H, Francke W. Orientation  
1064 of *Rhizophagus grandis* (Coleoptera: Rhizophagidae) to oxygenated  
1065 monoterpenes in a species-specific predator-prey relationship. *Chemoecology*.  
1066 1992;3: 14–18. doi:10.1007/BF01261451
- 1067 70. Pettersson EM, Birgersson G, Witzgall P. Synthetic attractants for the bark beetle  
1068 parasitoid *Coeloides bostrichorum* Giraud (Hymenoptera: Braconidae).  
1069 *Naturwissenschaften*. 2001;88: 88–91. doi:10.1007/s001140100209
- 1070 71. Martínez AS, Fernández-Arhex V, Corley JC. Chemical information from the  
1071 fungus *Amylostereum areolatum* and host-foraging behaviour in the parasitoid  
1072 *Ibalia leucospoides*. *Physiological Entomology*. 2006;31: 336–340.  
1073 doi:10.1111/j.1365-3032.2006.00523.x
- 1074 72. Tømmerås BÅ. Specialization of the olfactory receptor cells in the bark beetle *Ips*  
1075 *typographus* and its predator *Thanasimus formicarius* to bark beetle pheromones  
1076 and host tree volatiles. *Journal of Comparative Physiology A*. 1985;157: 335–341.  
1077 doi:10.1007/BF00618123
- 1078 73. Keeling CI, Bohlmann J. Genes, enzymes and chemicals of terpenoid diversity in  
1079 the constitutive and induced defence of conifers against insects and pathogens.  
1080 *New Phytologist*. 2006;170: 657–675. doi:10.1111/j.1469-8137.2006.01716.x

- 1081 74. Pichersky E, Raguso RA. Why do plants produce so many terpenoid compounds?  
1082 New Phytologist. 2018;220: 692–702. doi:10.1111/nph.14178
- 1083 75. Raffa KF, Smalley EB. Interaction of pre-attack and induced monoterpene  
1084 concentrations in host conifer defense against bark beetle-fungal complexes.  
1085 Oecologia. 1995;102: 285–295. doi:10.1007/BF00329795
- 1086 76. Franceschi VR, Krokene P, Christiansen E, Krekling T. Anatomical and chemical  
1087 defenses of conifer bark against bark beetles and other pests. New Phytologist.  
1088 2005. 353–376. doi:10.1111/j.1469-8137.2005.01436.x
- 1089 77. Erbilgin N, Krokene P, Christiansen E, Zeneli G, Gershenzon J. Exogenous  
1090 application of methyl jasmonate elicits defenses in Norway spruce (*Picea abies*)  
1091 and reduces host colonization by the bark beetle *Ips typographus*. Oecologia.  
1092 2006;148: 426–436. doi:10.1007/s00442-006-0394-3
- 1093 78. Chiu CC, Keeling CI, Bohlmann J. Toxicity of pine monoterpenes to mountain  
1094 pine beetle. Scientific Reports. 2017;7. doi:10.1038/s41598-017-08983-y
- 1095 79. Hammerbacher A, Schmidt A, Wadke N, Wright LP, Schneider B, Bohlmann J, et  
1096 al. A common fungal associate of the spruce bark beetle metabolizes the stilbene  
1097 defenses of Norway spruce. Plant Physiology. 2013;162: 1324–1336.  
1098 doi:10.1104/pp.113.218610
- 1099 80. Achotegui-Castells A, della Rocca G, Llusà J, Danti R, Barberini S, Bouneb M, et  
1100 al. Terpene arms race in the *Seiridium cardinale* - *Cupressus sempervirens*  
1101 pathosystem. Scientific Reports. 2016;6: 1–13. doi:10.1038/srep18954
- 1102 81. Kusumoto N, Zhao T, Swedjemark G, Ashitani T, Takahashi K, Borg-Karlson AK.  
1103 Antifungal properties of terpenoids in *Picea abies* against *Heterobasidion*  
1104 *parviporum*. Forest Pathology. 2014;44: 353–361. doi:10.1111/efp.12106
- 1105 82. Wang Y, Lim L, Madilao L, Lah L, Bohlmann J, Breuil C. Gene discovery for  
1106 enzymes involved in limonene modification or utilization by the mountain pine  
1107 beetle-associated pathogen *Grosmannia clavigera*. Applied and Environmental  
1108 Microbiology. 2014;80: 4566–4576. doi:10.1128/AEM.00670-14
- 1109 83. Lah L, Haridas S, Bohlmann J, Breuil C. The cytochromes P450 of *Grosmannia*  
1110 *clavigera*: Genome organization, phylogeny, and expression in response to pine  
1111 host chemicals. Fungal Genetics and Biology. 2013;50: 72–81.  
1112 doi:10.1016/j.fgb.2012.10.002
- 1113 84. Martin DM, Tholl D, Gershenzon J, Bohlmann J. Methyl jasmonate induces  
1114 traumatic resin ducts, terpenoid resin biosynthesis, and terpenoid accumulation in  
1115 developing xylem of norway spruce stems. Plant Physiology. 2002;129: 1003 –  
1116 1018. doi:10.1104/pp.011001

- 1117 85. Keeling CI, Weisshaar S, Ralph SG, Jancsik S, Hamberger B, Dullat HK, et al.  
1118 Transcriptome mining, functional characterization, and phylogeny of a large  
1119 terpene synthase gene family in spruce (*Picea* spp.). *BMC Plant Biology*.  
1120 2011;11. doi:10.1186/1471-2229-11-43
- 1121 86. Kalinová B, Břízová R, Knížek M, Turčáni M, Hoskovec M. Volatiles from spruce  
1122 trap-trees detected by *Ips typographus* bark beetles: Chemical and  
1123 electrophysiological analyses. *Arthropod-Plant Interactions*. 2014;8: 305–316.  
1124 doi:10.1007/s11829-014-9310-7
- 1125 87. Schiebe C, Unelius CR, Ganji S, Binyameen M, Birgersson G, Schlyter F.  
1126 Styrene, (+)-*trans*-(1R,4S,5S)-4-thujanol and oxygenated monoterpenes related to  
1127 host stress elicit strong electrophysiological responses in the bark beetle *Ips*  
1128 *typographus*. *Journal of Chemical Ecology*. 2019; 1–16. doi:10.1007/s10886-019-  
1129 01070-8
- 1130 88. Hunt DWA, Borden JH, Lindgren BS, Gries G. The role of autoxidation of  $\alpha$ -  
1131 pinene in the production of pheromones of *Dendroctonus ponderosae*  
1132 (Coleoptera: Scolytidae). *Canadian Journal of Forest Research*. 1989;19: 1275–  
1133 1282. doi:10.1139/x89-194
- 1134 89. Lindmark-Henriksson M, Isaksson D, Sjödin K, Högberg HE, Vaněk T, Valterová I.  
1135 Transformation of  $\alpha$ -pinene using *Picea abies* suspension culture. *Journal of*  
1136 *Natural Products*. 2003;66: 337–343. doi:10.1021/np020426m
- 1137 90. Lindmark-Henriksson M, Isaksson D, Vaněk T, Valterová I, Högberg HE, Sjödin K.  
1138 Transformation of terpenes using a *Picea abies* suspension culture. *Journal of*  
1139 *Biotechnology*. 2004;107: 173–184. doi:10.1016/j.jbiotec.2003.10.009
- 1140 91. Rahmani R, Hedenström E, Schroeder M. SPME collection and GC-MS analysis  
1141 of volatiles emitted during the attack of male *Polygraphus poligraphus*  
1142 (Coleoptera, Curculionidae) on Norway spruce. *Zeitschrift für Naturforschung -*  
1143 *Section C Journal of Biosciences*. 2015;70: 265–273. doi:10.1515/znc-2015-5035
- 1144 92. Rahmani R, Wallin EA, Viklund L, Schroeder M, Hedenström E. Identification and  
1145 field assay of two aggregation pheromone components emitted by males of the  
1146 bark beetle *Polygraphus punctifrons* (Coleoptera: Curculionidae). *Journal of*  
1147 *Chemical Ecology*. 2019;45: 356–365. doi:10.1007/s10886-019-01056-6
- 1148 93. Hou X-Q, Kumar Yuvaraj J, Roberts RE, Unelius CR, Löfstedt C, Andersson MN.  
1149 Functional evolution of a bark beetle odorant receptor clade detecting  
1150 monoterpenoids of different ecological origins. *bioRxiv*. 2020; 2020.12.28.424525.  
1151 doi:10.1101/2020.12.28.424525
- 1152 94. Birgersson G, Schlyter F, Löfqvist J, Bergström G. Quantitative variation of  
1153 pheromone components in the spruce bark beetle *Ips typographus* from different  
1154 attack phases. *Journal of Chemical Ecology*. 1984;10: 1029–1055.  
1155 doi:10.1007/BF00987511

- 1156 95. Zhao T, Ganji S, Schiebe C, Bohman B, Weinstein P, Krokene P, et al.  
1157 Convergent evolution of semiochemicals across Kingdoms: bark beetles and their  
1158 fungal symbionts. *ISME Journal*. 2019;13: 1535–1545. doi:10.1038/s41396-019-  
1159 0370-7
- 1160 96. Davis TS, Crippen TL, Hofstetter RW, Tomberlin JK. Microbial volatile emissions  
1161 as insect semiochemicals. *Journal of Chemical Ecology*. 2013;39: 840–859.  
1162 doi:10.1007/s10886-013-0306-z
- 1163 97. Kandasamy D, Gershenzon J, Hammerbacher A. Volatile organic compounds  
1164 emitted by fungal associates of conifer bark beetles and their potential in bark  
1165 beetle control. *Journal of Chemical Ecology*. 2016;42: 952–969.  
1166 doi:10.1007/s10886-016-0768-x
- 1167 98. Beck JJ, Vannette RL. Harnessing insect-microbe chemical communications to  
1168 control insect pests of agricultural systems. *Journal of Agricultural and Food  
1169 Chemistry*. 2017;65: 23–28. doi:10.1021/acs.jafc.6b04298
- 1170 99. Schlyter F, Cederholm I. Separation of the sexes of living spruce bark beetles, *Ips*  
1171 *typographus* (L.), (Coleoptera: Scolytidae). *Zeitschrift für Angewandte  
1172 Entomologie*. 1981;92: 42–47. doi:10.1111/j.1439-0418.1981.tb01650.x
- 1173 100. Kallenbach M, Oh Y, Eilers EJ, Veit D, Baldwin IT, Schuman MC. A robust,  
1174 simple, high-throughput technique for time-resolved plant volatile analysis in field  
1175 experiments. *Plant Journal*. 2014;78: 1060–1072. doi:10.1111/tpj.12523
- 1176 101. Chong J, Wishart DS, Xia J. Using MetaboAnalyst 4.0 for Comprehensive and  
1177 integrative metabolomics data analysis. *Current Protocols in Bioinformatics*.  
1178 2019;68. doi:10.1002/cpbi.86
- 1179 102. Babler JH, Malek NC, Coghlan MJ. Selective hydrolysis of  $\alpha,\beta$ - and  $\beta,\gamma$ -  
1180 unsaturated ketals: A method for deconjugation of  $\beta,\beta$ -disubstituted  $\alpha,\beta$ -  
1181 unsaturated ketones. *Journal of Organic Chemistry*. 1978;43: 1821–1823.  
1182 doi:10.1021/jo00403a047
- 1183 103. Andersson MN, Schlyter F, Hill SR, Dekker T. What reaches the antenna? How to  
1184 calibrate odor flux and ligand-receptor affinities. *Chemical Senses*. 2012;37: 403–  
1185 420. doi:10.1093/chemse/bjs009
- 1186 104. Andersson MN, Larsson MC, Svensson GP, Birgersson G, Rundlöf M, Lundin O,  
1187 et al. Characterization of olfactory sensory neurons in the white clover seed  
1188 weevil, *Apion fulvipes* (Coleoptera: Apionidae). *Journal of Insect Physiology*.  
1189 2012;58: 1325–1333. doi:10.1016/j.jinsphys.2012.07.006



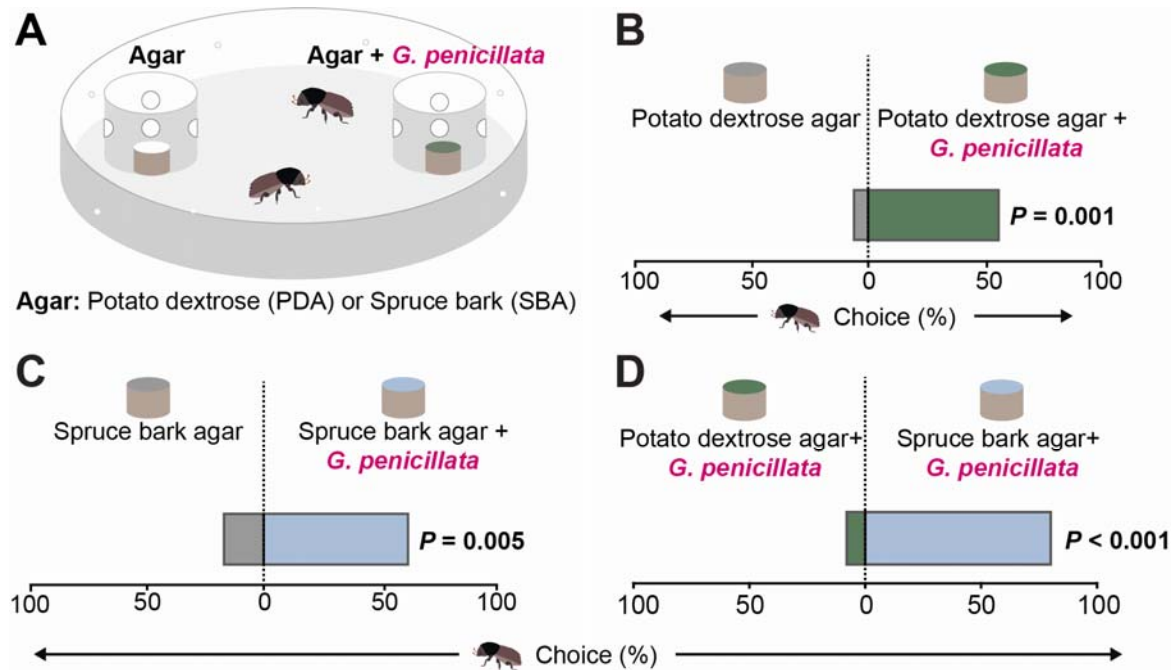

**Figure 1: *Ips typographus* uses volatile cues from spruce bark inoculated with *G. penicillata* (*Gp*) to detect this symbiotic fungus.**

**(A)** Arena used for trap bioassays to study the behavior of bark beetles to volatiles emitted by a symbiotic fungus. Cups containing agar (with and without fungus) were offered to beetles as odor samples. Holes on each side of the cup allowed the beetles to smell, but not touch the agar until they entered the cup and then could no longer escape. **(B), (C)** Adult beetles chose *Gp*-colonized agar medium over fungus-free medium ( $n = 25$ , with two beetles per replicate). **(D)** Adult beetles chose *Gp*-inoculated spruce bark agar over *Gp*-inoculated agar without spruce bark ( $n = 25$ ). **(B), (C), (D)** Deviation of response indices against zero was tested using Wilcoxon's test. Asterisks denotes significant differences, \* $P < 0.01$ , \*\*\* $P < 0.001$ .

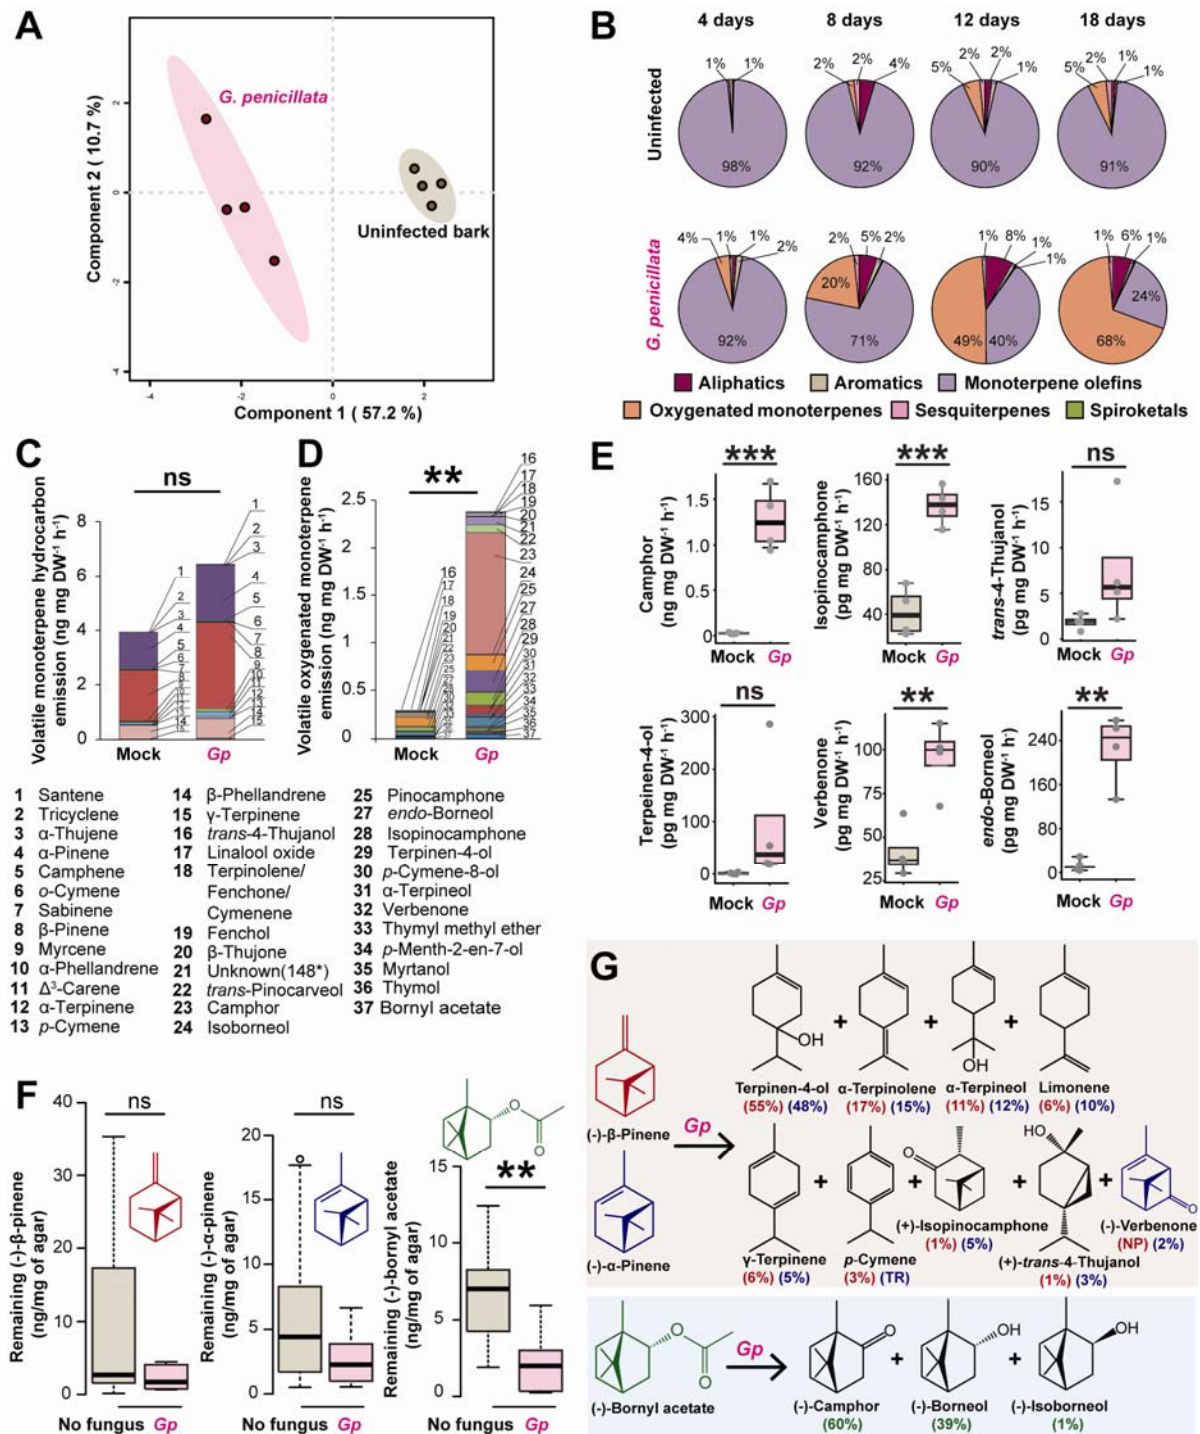

**Figure 2: Growth of *Ips typographus* symbiotic fungi on spruce bark induces increased emission of oxygenated monoterpenes.**

**(A)** Volatile emission pattern differed between spruce bark inoculated with *G. penicillata* (*Gp*) and uninfected bark 4 days after inoculation, as depicted in a partial least squares discriminant analysis (PLS-DA). Principal components (PC1 and PC2) explain 57.2% and 10.7% of total variation, respectively, and ellipses denote 95% confidence intervals around

each treatment. Complete volatile emission data by compound for *G. penicillata* and other *I. typographus* fungal symbionts are given in Table S2. **(B)** Changes in volatile emission profiles of spruce bark due to *G. penicillata* infection over an 18 d time course. Compounds are classified into six groups by their chemical structures ( $n = 5$ ). Complete volatile emission data by compound and time point for *G. penicillata* and other symbionts are given in Tables S3-S6. **(C), (D)** Emission of specific monoterpenes from fresh spruce bark inoculated with *G. penicillata* at four days post inoculation. Identified compounds were classified into monoterpene hydrocarbons **(C)** and oxygenated monoterpenes **(D)**. The individual compounds are stacked within a single bar representing the total emission. Significant differences in the total emission levels induced by *G. penicillata* are denoted by asterisks above the bars ( $n = 4$ , Welch's t-test with ns= not significant  $*P < 0.05$ ,  $**P < 0.01$ ,  $***P < 0.001$ ). The numbers denote the identities of the compounds in the stacked bars. Complete volatile emission data are given in Table S2. **(E)** Emission rate of major oxygenated monoterpenes from spruce bark inoculated with *G. penicillata* four days post inoculation. Asterisks indicate significant differences between the spruce bark-inoculated *G. penicillata* and the fungus-free control (Welch's t-test). **(F-G)** Metabolism of major spruce monoterpenes by *G. penicillata* after fungal-infected vs. uninfected PDA was supplemented with 0.5 mg/g of (-)- $\beta$ -pinene, (-)- $\alpha$ -pinene and (-)-bornyl acetate. **(F)** The amounts of starting monoterpenes remaining after four days. Error bars represent SEM ( $n = 5$ ). Asterisks indicate significant difference between the PDA-inoculated *G. penicillata* and the fungus-free control (Welch's t-test) with ns= not significant,  $**P < 0.01$ . **(G)** The most abundant metabolites of administered monoterpenes are depicted with their percentages relative to the total amounts of metabolites detected for each compound (derived from (-)- $\beta$ -pinene in red; derived from (-)- $\alpha$ -pinene in purple; derived from (-)-bornyl acetate in green) ( $n = 4$ ). Amounts were determined by headspace collection of volatiles from the agar ( $n = 3$ ).

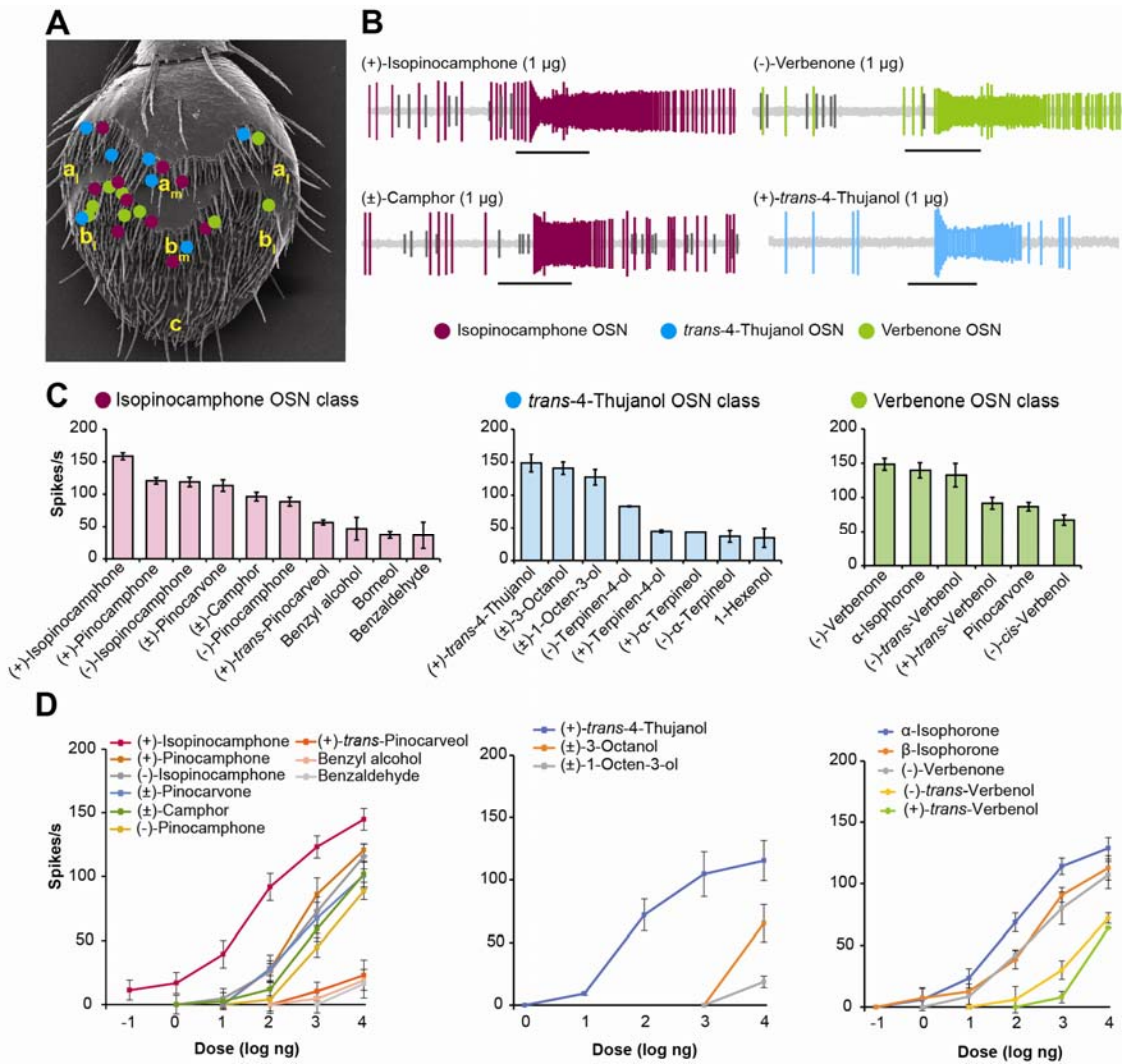

**Figure 3: Oxygenated monoterpenes derived from fungal metabolism of host tree monoterpene hydrocarbons are detected by specialized olfactory neurons in the *I. tyroglyphus* antenna**

(A) Mapping of three classes of olfactory sensory neurons (OSN) selective for oxygenated monoterpenes (isopinocampone; verbenone; (-)-*trans*-4-thujanol) on the antenna. Olfactory sensilla housing these OSN classes are distributed in medial (subscript “m”) and lateral (subscript “l”) regions of sensillum areas a and b (but not in area c) of the antenna. (B) Representative spike trains from an isopinocampone-responsive neuron stimulated with 1 µg of (+)-isopinocampone (top left) and (±)-camphor (bottom left); a verbenone-responsive neuron stimulated with 1 µg (-)-verbenone (top right); a (+)-*trans*-4-thujanol-responsive neuron stimulated with 1 µg (+)-*trans*-4-thujanol (bottom right). Black horizontal bars indicate the 0.5 s odor puffs. (C) Response spectra of OSN classes responding predominantly to oxygenated monoterpenes produced by fungi at the 10 µg screening dose. The average number of spikes/second was recorded from the isopinocampone-tuned OSN class (left) ( $n = 6$  except (+) and (-)-pinocampone ( $n = 3$ )), *trans*-4-thujanol-tuned OSN class (middle) ( $n = 5$ ) and verbenone and isophorone-tuned OSN class (right) ( $n = 4$ ) after neurons were stimulated with a panel of 97 odors. Error bars represent SEM. (D) Dose-response curves of the OSNs stimulated with their most active ligands: isopinocampone-tuned OSN class (left)

(( $n = 9$ ) except for (+) and (-)-pinocamphone ( $n = 3$ )), *trans*-4-thujanol-tuned OSN class (middle) ( $n = 3$ ), and the OSN class tuned to isophorone and verbenone (right) ( $n = 3$ ). Error bars represent SEM.

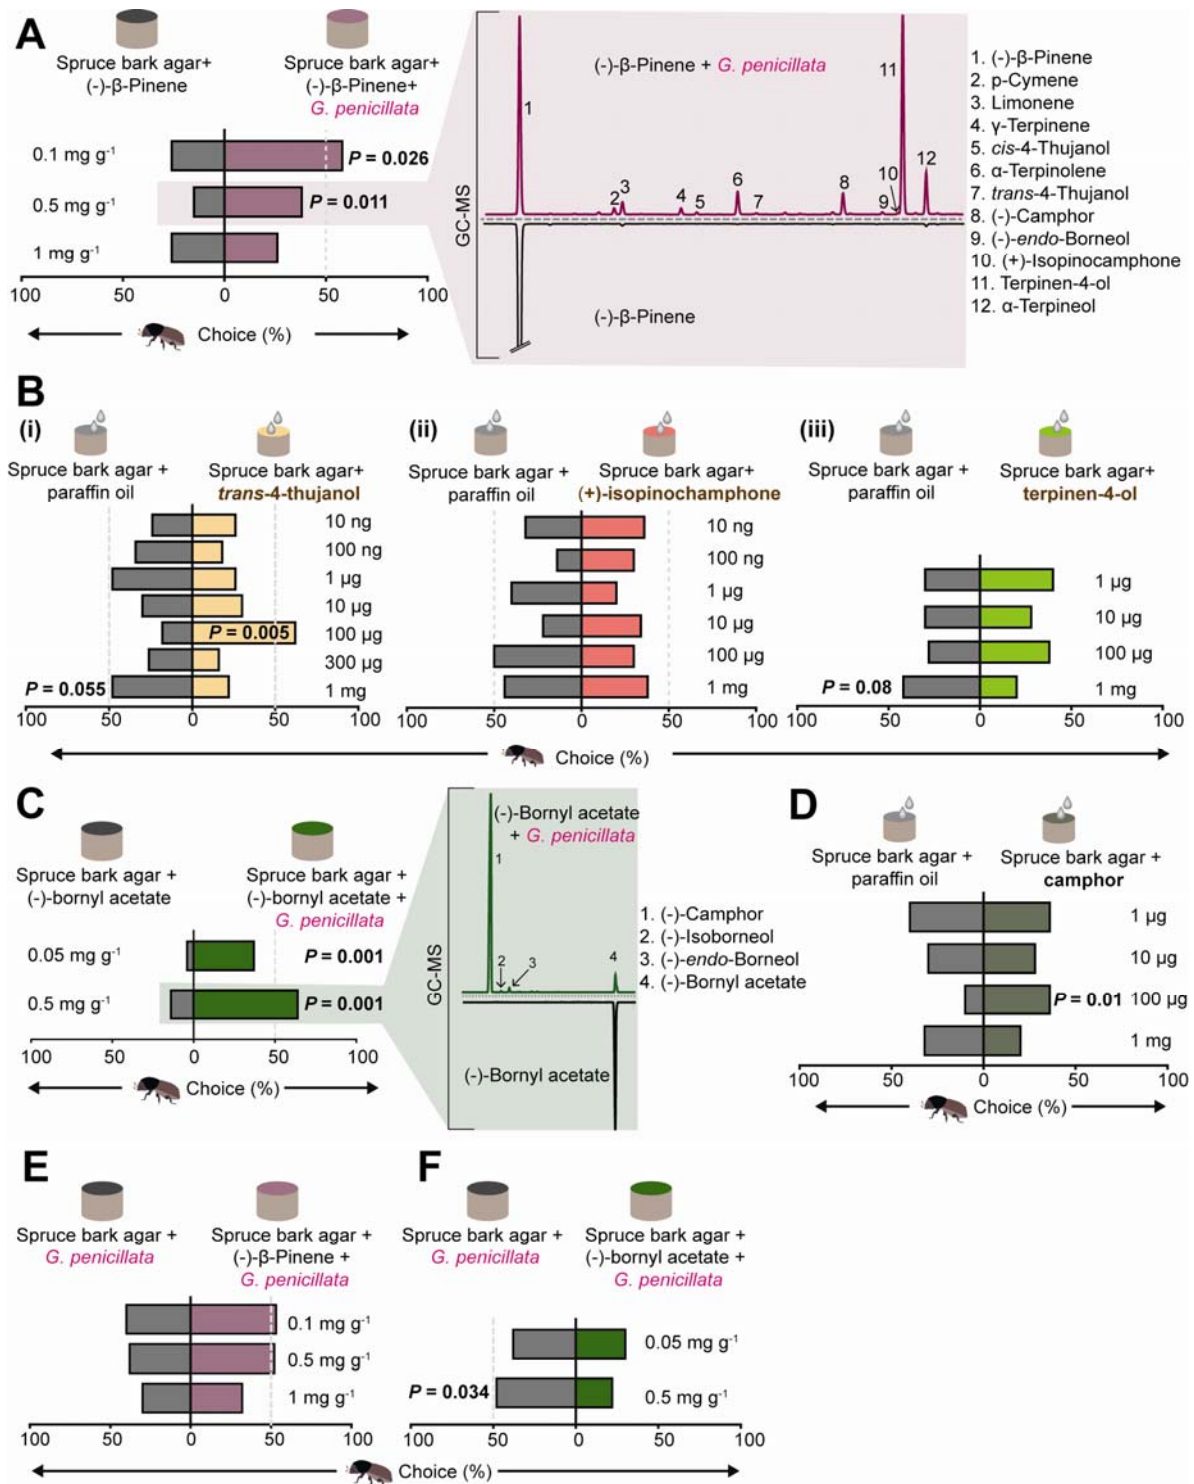

**Figure 4: Bark beetles are attracted to oxygenated monoterpenes produced by symbiotic fungi.**

**(A)** Adult beetles preferred spruce bark agar enriched with 0.1 mg/g, and 0.5 mg/g of (-)-β-pinene inoculated with *G. penicillata* for 4 days over spruce bark agar enriched with 0.1 mg/g, and 0.5 mg/g (-)-β-pinene but without fungus (left). GC-MS traces of the headspace volatiles of (-)-β-pinene-enriched agar with and without *G. penicillata* for 4 days (right) showing the oxygenated monoterpenes produced by the fungus from (-)-β-

pinene. Numbers refer to the identities of compounds. **(B)** Adult beetles chose *trans*-4-thujanol (left) at a 100 µg dose but avoided *trans*-4-thujanol (left) at a 1 mg dose diluted in mineral oil, when tested against a mineral oil control. Adult beetles showed indifferent responses to (+)-isopinocampone (middle), and terpinen-4-ol (right), applied in various doses in mineral oil. **(C)** Adult beetles preferred spruce bark agar enriched with various amounts of (-)-bornyl acetate inoculated with *G. penicillata* for 4 days over spruce bark agar enriched with (-)-bornyl acetate but without fungus (left). GC-MS traces of the headspace volatiles of 0.5 mg/g (-)-bornyl acetate-enriched agar with and without *G. penicillata* (right) showing the oxygenated monoterpenes produced by the fungus from (-)-bornyl acetate. Numbers refer to the identities of compounds. **(D)** Adult beetles preferred ( $\pm$ )-camphor at a 100 µg dose against a mineral oil control, but not at other doses. **(E)** Adult beetles did not discriminate between *G. penicillata* on agar with three different concentrations of (-)- $\beta$ -pinene and *G. penicillata* without (-)- $\beta$ -pinene. **(F)** Adult beetles chose *G. penicillata* on agar without any administered (-)-bornyl acetate vs. *G. penicillata* on agar with 0.5 mg/g (-)-bornyl acetate. **(A), (B), (C), (D), (E), (F)** Deviation of response indices against zero was tested using Wilcoxon's test. Asterisks denotes significant differences, \* $P < 0.05$ , \*\* $P < 0.01$ , \*\*\* $P < 0.001$ .  $n = 25$  for each trial.

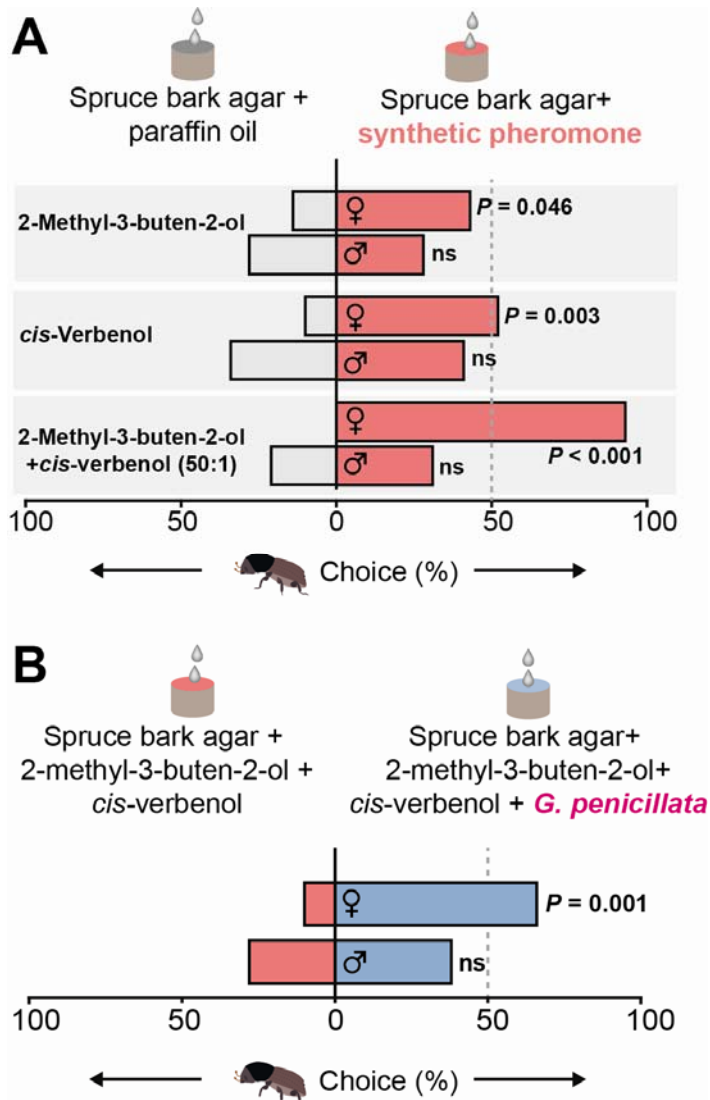

**Figure 5: Female adult bark beetles are attracted towards a pheromone mixture in the presence of *G. penicillata* volatiles**

**(A)** Adult females chose traps containing 2-methyl-3-buten-2-ol (MB) and *cis*-verbenol at  $10^{-2}$  concentration diluted in mineral oil over control traps containing mineral oil. Females strongly preferred traps containing a binary pheromone blend (*cis*-verbenol: 2-methyl-3-buten-2-ol, 50:1) diluted in mineral oil over the mineral oil control (bottom). Adult males were unresponsive to these concentrations of individual pheromones and their blend. **(B)** Adult females preferred pheromone blend in the presence of *G. penicillata* volatiles over pheromone blend without fungus. **(A), (B)**. Deviation of response indices against zero was tested using Wilcoxon's test. Asterisks denotes significant differences, \* $P < 0.05$ , \*\* $P < 0.01$ , \*\*\* $P < 0.001$  ( $n = 28$  for each experiment).



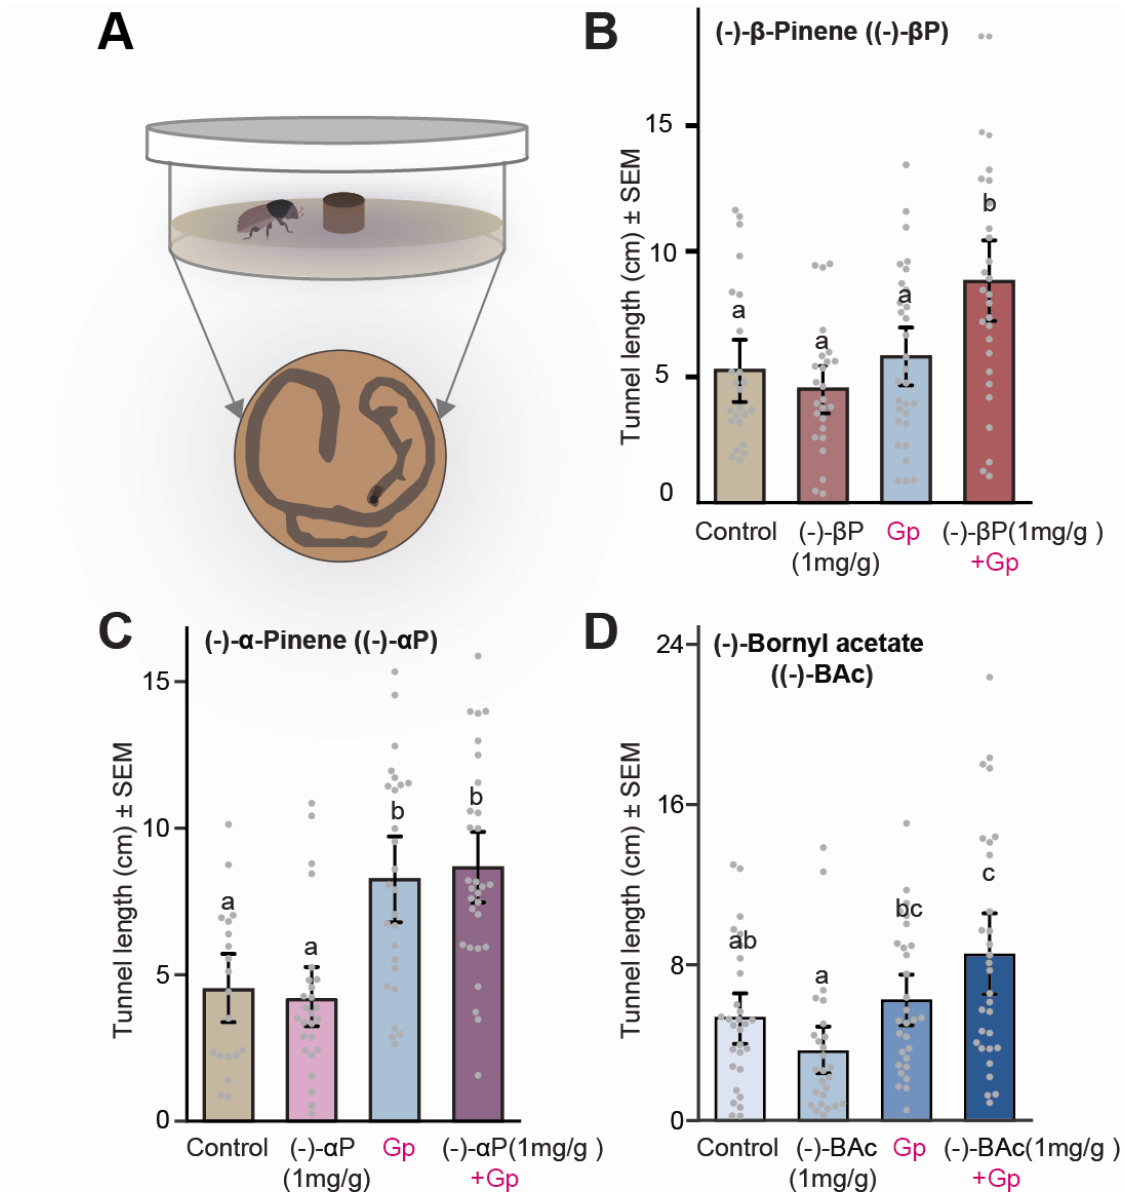

**Figure 6: Bark beetles tunnel more in monoterpene-enriched diet in the presence of a symbiotic fungus.**

**(A)** Schematic drawing of a Petri dish arena used for the no-choice tunneling assay. The dish was filled with monoterpene-enriched spruce bark agar and inoculated with *G. penicillata* (Gp) (top). Example of the tunneling pattern of an adult beetle within the fungus-colonized diet as pictured from the bottom side of Petri dish (bottom). **(B), (C), (D)** Tunnel lengths (cm) made by adult beetles after 48 hours in diet containing *G. penicillata* only, monoterpenes only, *G. penicillata* and monoterpenes, or controls with neither *G. penicillata* nor monoterpenes. Error bars represent SEM ( $n = 30$  (15 ♂, 15 ♀) for each trial). Monoterpenes: (-)-β-pinene **(B)**, (-)-α-pinene **(C)**, (-)-bornyl acetate **(D)**. Different lowercase letters indicate significant differences between treatments (ANOVA, Tukey's test,  $P < 0.05$ ).

**Table 1:** Multiple logistic regression analysis predicting the odds of adult bark beetles tunneling into media enriched in different monoterpenes with and without *G. penicillata* in a no-choice assay (see also Fig 6A).

| Successful tunneling in diets with <sup>a</sup> | Predictors  | $\beta$ | SE <sup>b</sup> | Wald $\chi^2$ | <i>P</i> value   | Exp( $\beta$ ) | 95% CI for Exp( $\beta$ ) |         |
|-------------------------------------------------|-------------|---------|-----------------|---------------|------------------|----------------|---------------------------|---------|
|                                                 |             |         |                 |               |                  |                | Lower                     | Upper   |
| (-)-Bornyl acetate                              | Monoterpene | -0.31   | 0.56            | 0.31          | ns               | 0.73           | 0.25                      | 2.19    |
|                                                 | Sex         | -1.72   | 0.58            | 8.78          | <b>0.003</b>     | 0.18           | 0.06                      | 0.56    |
|                                                 | Fungus      | 4.98    | 1.09            | 20.99         | <b>&lt;0.001</b> | 145.30         | 17.27                     | 1222.52 |
| (-)- $\beta$ -Pinene                            | Monoterpene | -0.87   | 0.54            | 2.57          | ns               | 0.42           | 0.14                      | 1.22    |
|                                                 | Sex         | 0.25    | 0.52            | 0.24          | ns               | 1.29           | 0.47                      | 3.55    |
|                                                 | Fungus      | 2.65    | 0.58            | 20.45         | <b>&lt;0.001</b> | 14.09          | 4.48                      | 44.36   |
| (-)- $\alpha$ -Pinene                           | Monoterpene | 0.00    | 0.52            | 0.00          | ns               | 1.00           | 0.36                      | 2.75    |
|                                                 | Sex         | 0.00    | 0.52            | 0.00          | ns               | 1.00           | 0.36                      | 2.75    |
|                                                 | Fungus      | 2.02    | 0.66            | 9.39          | <b>0.002</b>     | 7.51           | 2.07                      | 27.28   |

<sup>a</sup>The reference category is unsuccessful tunneling

<sup>b</sup>Standard error of  $\beta$

ns=not significant
